# Supplementary material for: A comprehensive study of isomerization and protonation reactions in the photocycle of the photoactive yellow protein
Source: Royal Society of Chemistry journal article supplement (doi:10.1039/c4cp03495c), 2014-01-01
Supplement: c4cp03495c1.pdf [file c4cp03495c1.pdf]

## Electronic Supplementary Information

for

### *A Comprehensive Study of Isomerization and Protonation Reactions in the Photocycle of Photoactive Yellow Protein*

Lili Wei<sup>†</sup>, Hongjuan Wang<sup>†</sup>, Xuebo Chen<sup>\*†</sup>, Weihai Fang<sup>†</sup> and Haobin Wang<sup>‡\*</sup>

<sup>†</sup>Key Laboratory of Theoretical and Computational Photochemistry of Ministry of Education, Department of Chemistry, Beijing Normal University, Xin-wai-da-jie No. 19, Beijing, 100875, People's Republic of China

<sup>‡</sup>Department of Chemistry and Biochemistry, New Mexico State University, Las Cruces, NM 88003, USA

#### Contents

1. Computational Details
  - 1.1 Model Setup
  - 1.2 Equilibrium Molecular Dynamics
  - 1.3 QM/MM Computational Protocol
    - 1.3.1 QM Method
    - 1.3.2 Vertical Excitation Energies
    - 1.3.3 Optimizations of Minima and Paths
    - 1.3.4 Packages
2. References
3. Figures
4. Tables (S4-1 to S4-5)
5. Cartesian Coordinates

## **1. Computational Details**

**1.1 Model Setup:** The NMR structure of PYP (PDB code: 3PHY) <sup>[S1]</sup> containing the native chromophore of the p-coumaric acid (pCA) was used to construct the initial QM/MM model. Six Na<sup>+</sup> counterions were added using the xleap module of the AMBER9 package<sup>[S2]</sup> to neutralize the system in accordance with experimental conditions. The 1046 crystal water molecules in the protein were kept in the model.

**1.2 Equilibrium Molecular Dynamics (MD):** The initially constructed system was equilibrated for 1 ns using classical canonical MD simulations (at 298 K). The general Amber force field (GAFF), the Amber99 force field,<sup>[S2]</sup> and the TIP3P water model were used for the chromophore, the amino acid residues of the PYP, and the water molecules, respectively. A cutoff radius of 9.0 Å was used for truncating the electrostatic and van der Waals interactions. All MD simulations were performed with the TINKER4.2 package.<sup>[S3]</sup> Starting from a MD snapshot, the initial QM/MM structure was manually generated with an appropriate intermolecular hydrogen-bonding network.

### **1.3 QM/MM Computational Protocol:**

The four QM/MM partitionings are shown in Scheme S1. To explicitly describe the first step of photoisomerization, the QM1 subsystem (33 atoms) including the pCA chromophore and a portion of the Glu46 and Cys69 residues was used. To comprehensively account for the later isomerization steps of I<sub>CP</sub> → pR<sub>2</sub> and pR<sub>1</sub> → pR<sub>2</sub>, as well as subsequent processes involving two typical structural deformations via a simultaneous torsion along the non-adjacent or adjacent two bonds (d/f and d/e), the QM2 subsystem includes the whole Cys69 residue with 40 atoms. To compute the MEPs of the protonation/deprotonation steps, another one and three crystal water molecules have been added to the QM3 and QM4 subsystems, respectively. Moreover, a portion of Tyr42 was also cast into the

QM3 subsystem to account for its role of proton transfer relay. Consequently, the numbers of atoms of QM3 and QM4 increase to 52 and 42. The MM subsystem includes the remaining residues, water molecules, and counterions. The boundary separating the QM and MM regions was treated by the hydrogen link-atom scheme (the wavy lines in Scheme S1). To reduce the strong electrostatic interactions between a link atom and its nearest MM atoms, some point charges were set to zero, and the neighboring MM point charges were re-parameterized (Table S1). For the remaining MM atoms, standard force-field point charges were used.

**1.3.1 QM Method:** The calculations of the QM parts were conducted at the complete active space self-consistent field (CASSCF) level of theory with appropriate basis sets and active spaces. The constrained minimum energy profiles (MEPs) for the isomerization and proton transfer reactions were computed by stepwise optimizations at the CASSCF level of theory with a 14e/11o active space using the 6-31G\* basis set. To describe proton transfer at the ground state, the corresponding donor  $\sigma/\sigma^*$  orbital and the acceptor n orbital were included in the active space. The rest of 10e/9o came from the high-lying occupied  $\pi$  and the low-lying  $\pi^*$  orbitals that are mainly distributed in the phenoxy ring of pCA.

Geometry optimizations were performed using a 2-root state-averaged CASSCF approach ( $S_0$  and  $S_1$ , equal weights) for the  $S_1$  state and a state-specific approach for the  $S_0$  state. Single-point energies at all optimized structures were determined from the 4-root state-averaged CASPT2//CASSCF calculations to include more dynamical electron correlation. These calculations were performed without an ionization potential-electron affinity (IPEA) shift but included an energy-level shift of 0.2 a.u. to avoid intruder state problems.

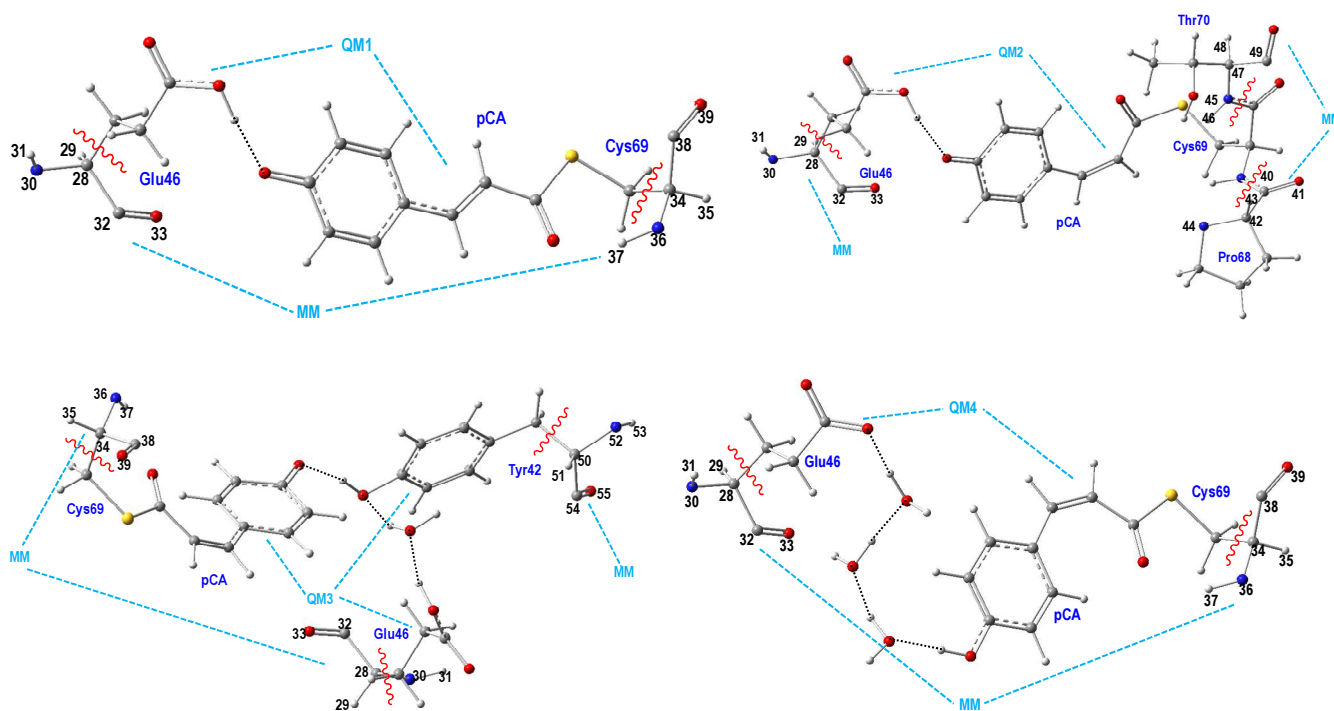

**Scheme S1.** The chosen QM/MM partitioning: QM1: pCA + a portion of the Glu46 and Cys69 residues; QM2: pCA + a portion of the Glu46 residue + the Cys69 residue; QM3: pCA + a portion of the Glu46, Cys69, Tyr42 residue + one crystal water molecule; QM4: pCA + a portion of the residue Glu46, Cys69 + three crystal water molecules; the MM subsystem includes the other amino acid residues, counterions, and water molecules. See texts for details.

**Table S1.** Re-parameterized point charges (a.u.) for the MM atoms near the QM/MM boundary.

|     |         |     |         |     |         |
|-----|---------|-----|---------|-----|---------|
| C28 | 0.0000  | C40 | 0.0000  | C50 | 0.0000  |
| H29 | 0.1144  | O41 | -0.3748 | H51 | 0.1144  |
| N30 | -0.4157 | C42 | 0.0130  | N52 | -0.4157 |
| H31 | 0.2719  | H43 | 0.2641  | H53 | 0.2719  |
| C32 | 0.5973  | N44 | -0.1048 | C54 | 0.5973  |
| O33 | -0.5679 | N45 | 0.0000  | O55 | -0.5679 |
| C34 | 0.0000  | H46 | 0.0719  |     |         |
| H35 | 0.1144  | C47 | -0.0546 |     |         |
| N36 | -0.4157 | H48 | 0.0007  |     |         |

---

|     |         |     |        |
|-----|---------|-----|--------|
| H37 | 0.2719  | C49 | 0.4973 |
| C38 | 0.5973  |     |        |
| O39 | -0.5679 |     |        |

---

**1.3.2 Vertical Excitation Energies:** Vertical excitation energies, oscillator strengths and transition dipole moments to the three lowest excited singlet states of QM1 at the Franck-Condon (FC) point were computed using the CASPT2//CASSCF and CASSI//CASSCF methods at the CASSCF-optimized  $S_0$  minimum.

**1.3.3 Optimizations of Minima, Intermediates and Minimum Energy Paths:** The local minima and intermediates for the  $S_0$  and  $S_1$  states were fully optimized at the QM (CASSCF)/AMBER level. At the same computational level, the minimum-energy paths for the isomerization and the proton transfer reaction were also computed using reaction-coordinate-constrained optimizations, in which the chosen reaction coordinate was fixed at a given value and all remaining degrees of freedom were fully relaxed.

**1.3.4 Program Packages:** The CASSCF calculations were performed using GAUSSIAN03.<sup>[S4]</sup> The CASPT2 and CASSI calculations were performed using MOLCAS7.6,<sup>[S5]</sup> whereas the MM calculations were conducted under the AMBER99<sup>[S2]</sup> force field using TINKER4.2.<sup>[S3]</sup> The interface between the QM and MM parts was coded by Ferré et al. and included in the Molcas program.<sup>[S6]</sup>

## 2. References

- [S1] Dux, P.; Rubinstenn, G.; Vuister, G. W.; Boelens, R.; Mulder, F. A. A.; Hård, K.; Hoff, W. D.; Kroon, A. R.; Crielaard, W.; Hellingwerf, K. J.; Kaptein, R. *Biochemistry* **1998**, *37*, 12689-12699.
- [S2] Case, D. A. et al. *AMBER 9*. Univ. California, San Francisco, **2006**.
- [S3] Ponder, J. W.; Richards, F. M. *J. Comput. Chem.* **1987**, *8*, 1016-1024.
- [S4] Frisch, M. J.; Trucks, G. W.; Schlegel, H. B.; Scuseria, G. E.; Robb, M. A.; Cheeseman, J. R.; Montgomery Jr., J. A.; Vreven, T.; Kudin, K. N.; Burant, J. C.; Millam, J. M.; Iyengar, S. S.; Tomasi, J.; Barone, V.; Mennucci, B.; Cossi, M.; Scalmani, G.; Rega, N.; Petersson, G. A.; Nakatsuji, H.; Hada, M.; Ehara, M.; Toyota, K.; Fukuda, R.; Hasegawa, J.; Ishida, M.; Nakajima, T.; Honda, Y.; Kitao, O.; Nakai, H.; Klene, M.; Li, X.; Knox, J. E.; Hratchian, H. P.; Cross, J. B.; Adamo, C.; Jaramillo, J.; Gomperts, R.; Stratmann, R. E.; Yazyev, O.; Austin, A. J.; Cammi, R.; Pomelli, C.; Ochterski, J. W.; Ayala, P. Y.; Morokuma, K.; Voth, G. A.; Salvador, P.; Dannenberg, J. J.; Zakrzewski, V. G.; Dapprich, S.; Daniels, A. D.; Strain, M. C.; Farkas, O.; Malick, D. K.; Rabuck, A. D.; Raghavachari, K.; Foresman, J. B.; Ortiz, J. V.; Cui, Q.; Baboul, A. G.; Clifford, S.; Cioslowski, J.; Stefanov, B. B.; Liu, G.; Liashenko, A.; Piskorz, P.; Komaromi, I.; Martin, R. L.; Fox, D. J.; Keith, T.; Al-Laham, M. A.; Peng, C. Y.; Nanayakkara, A.; Challacombe, M.; Gill, P. M. W.; Johnson, B.; Chen, W.; Wong, M. W.; González, C.; Pople, J. A. *Gaussian03*, Revision D.02, Gaussian, Inc.: Pittsburgh, PA, **2004**.
- [S5] Andersson, K.; Aquilante, F.; Barysz, M.; Bednarz, E.; Bernhardsson, A.; Blomberg, M. R. A.; Carissan, Y.; Cooper, D. L.; Cossi, M.; Devarajan, A.; De Vico, L.; Ferré, N.; Fülscher, M. P.; Gaenko, A.; Gagliardi, L.; Ghigo, G.; de Graaf, C.; Hess, B. A.; Hagberg, D.; Holt, A.; Karlström, G.; Krogh, J. W.; Lindh, R.; Malmqvist, P.-Å.; Nakajima, T.; Neogrády, P.; Olsen, J.; Pedersen, T. B.; Raab, J.; Reiher, M.; Roos, B. O.; Ryde, U.; Schimmelpfennig, B.; Schütz, M.; Seijo, L.; Serrano-Andrés, L.; Siegbahn, P. E. M.; Stålring, J.; Thorsteinsson, T.; Veryazov, V.; Widmark, P.-O. and Wolf, A., *Molcas Version 7.6*, Lund University, Sweden, **2010**.
- [S6] Ferré, N.; Cembran, A.; Garavelli, M.; Olivucci, M. *Theo. Chem. Acc.* **2004**, *112*, 335-341.

### 3. Figures

Figure S3-1. The structural evolution of the binding pocket in photocycle of PYP.

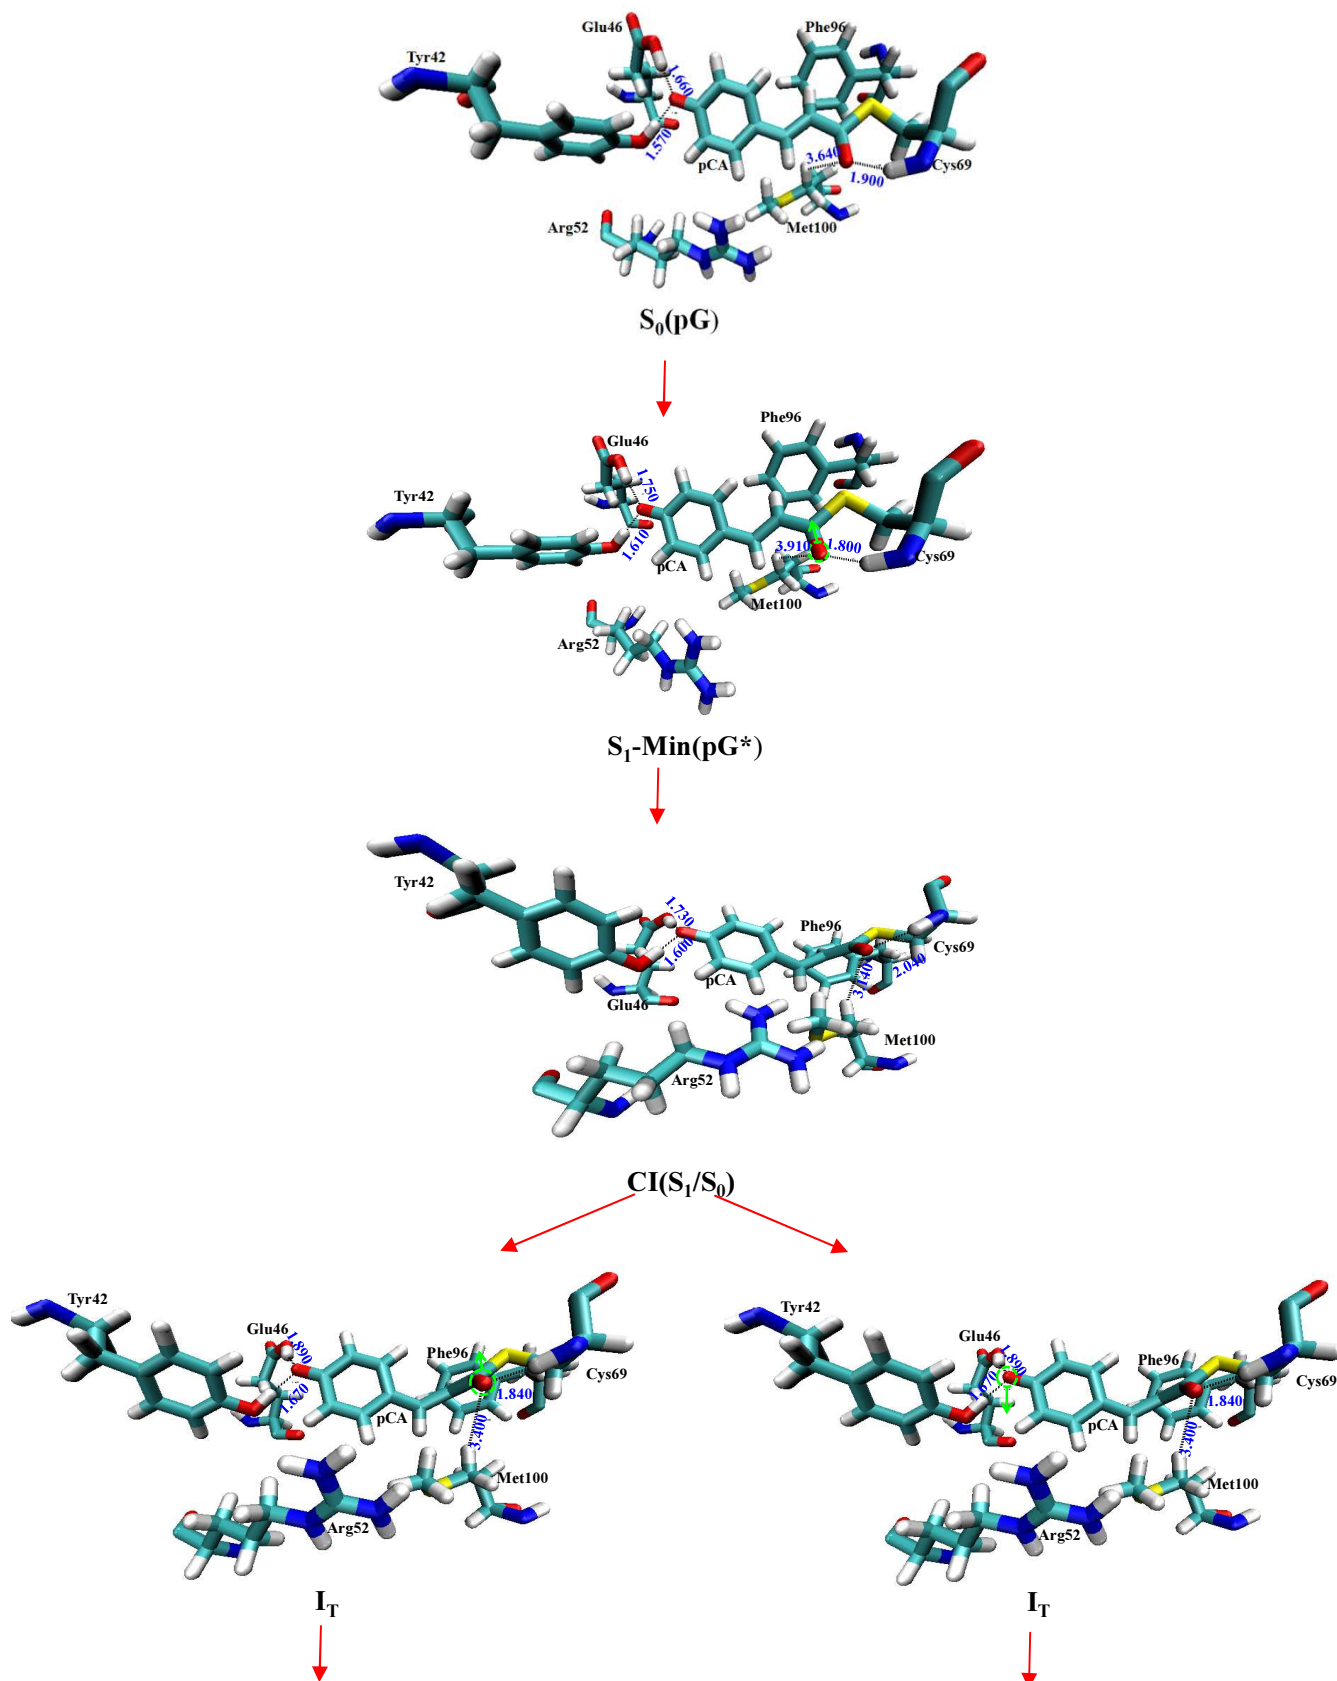

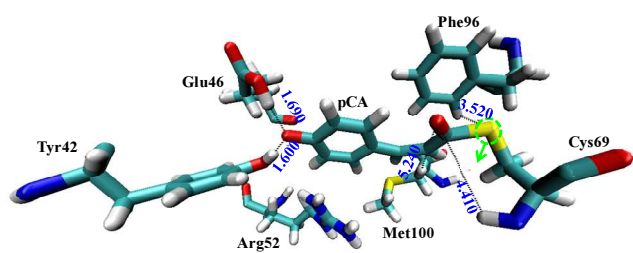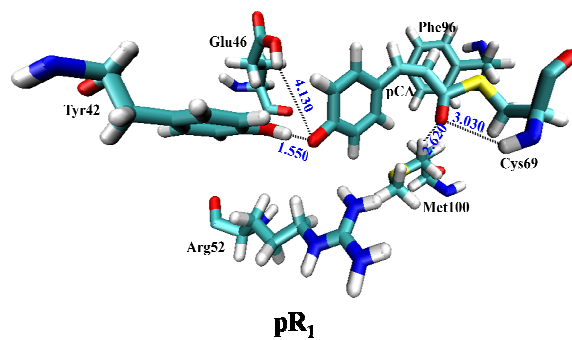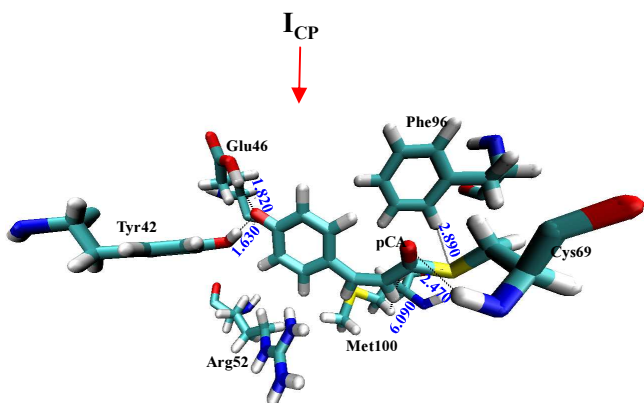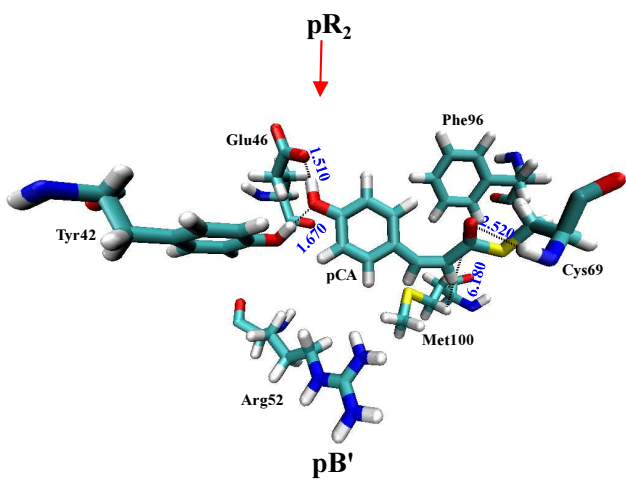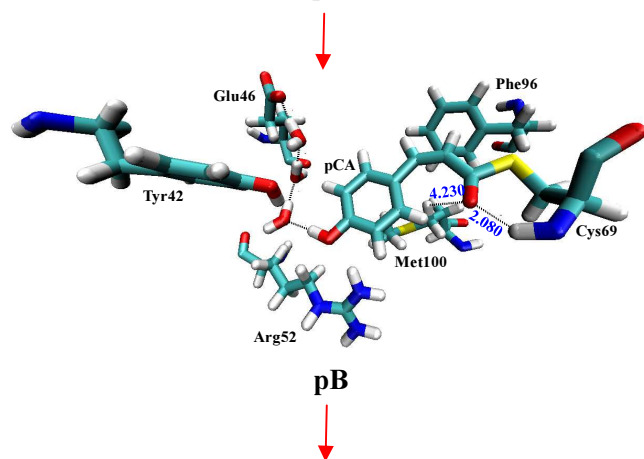



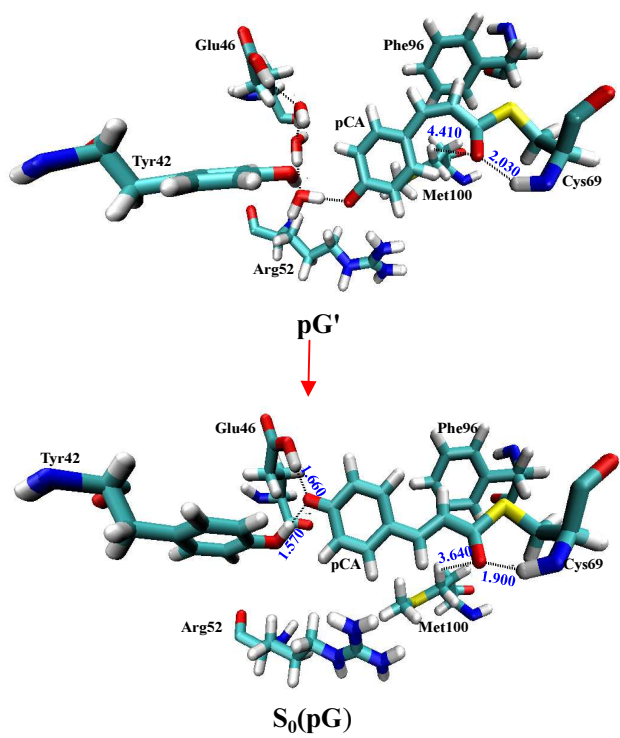

## 4. Tables

**Table S4-1.** Vertical excitation energies ( $E_L$ , eV), oscillator strengths ( $f$ ), transition dipole moments ( $D.M.$ , Debye), and the characters of singly occupied orbitals of different transitions at the Franck-Condon (FC) geometrie for PYP. The values were computed with the 4-root state-average CASPT2//CASSCF(14e,11o)/AMBER method.

| state          | $E_L$       | $f$   | $D.M.$ | singly occupied orbitals                                                            |
|----------------|-------------|-------|--------|-------------------------------------------------------------------------------------|
| S <sub>0</sub> |             |       | 33.21  |                                                                                     |
| S <sub>1</sub> | 2.88(431nm) | 1.059 | 40.05  |   |
| S <sub>2</sub> | 3.93        | 0.050 | 32.56  |   |
| S <sub>3</sub> | 4.57        | 0.050 | 39.95  |  |

**Table S4-2.** Absolute energies (A.E., hartree), relative energies ( $\Delta E$ , kcal/mol), and MM energies (hartree) of optimized structures for initial excited state relaxation along the reaction coordinate of C9-C10-C11-C12 dihedral angle(°) in PYP. The corresponding energy profiles are plotted in Figure 2 of the main article.

| C9C10C11C12                                        | CASPT2<br>A.E. | MM part    | $\Delta E$ |
|----------------------------------------------------|----------------|------------|------------|
| <b>S<sub>0</sub>-min(170.3°)</b>                   |                |            |            |
| Root1 (S <sub>0</sub> )                            | -1200.527041   | -28.167790 | 0          |
| Root2 (S <sub>1</sub> ( <sup>1</sup> $\pi\pi^*$ )) | -1200.421290   |            | 66.4       |
| Root3                                              | -1200.382426   |            | 90.7       |
| Root4                                              | -1200.358930   |            | 105.5      |
| <b>S<sub>1</sub>-min(155.5°)</b>                   |                |            |            |
| Root1 (S <sub>0</sub> )                            | -1200.515266   | -28.168868 | 6.7        |
| Root2 (S <sub>1</sub> ( <sup>1</sup> $\pi\pi^*$ )) | -1200.426049   |            | 62.7       |
| Root3                                              | -1200.373523   |            | 95.7       |
| Root4                                              | -1200.357454   |            | 105.7      |
| <b>S<sub>1</sub>-(150°)</b>                        |                |            |            |
| Root1 (S <sub>0</sub> )                            | -1200.510706   | -28.169752 | 9.0        |
| Root2 (S <sub>1</sub> ( <sup>1</sup> $\pi\pi^*$ )) | -1200.424819   |            | 62.9       |
| Root3                                              | -1200.372740   |            | 95.6       |

|                                            |              |            |        |
|--------------------------------------------|--------------|------------|--------|
| Root4                                      | -1200.353770 |            | 107.5  |
| <b>S<sub>1</sub>-(145°)</b>                |              |            |        |
| Root1 (S <sub>0</sub> )                    | -1200.507475 | -28.170155 | 10.8   |
| Root2 (S <sub>1</sub> ( <sup>1</sup> ππ*)) | -1200.424510 |            | 62.8   |
| Root3                                      | -1200.372819 |            | 95.3   |
| Root4                                      | -1200.351532 |            | 108.6  |
| <b>S<sub>1</sub>-(135°)</b>                |              |            |        |
| Root1 (S <sub>0</sub> )                    | -1200.499501 | -28.176536 | 11.8   |
| Root2 (S <sub>1</sub> ( <sup>1</sup> ππ*)) | -1200.423685 |            | 59.3   |
| Root3                                      | -1200.371533 |            | 92.1   |
| Root4                                      | -1200.346698 |            | 107.7  |
| <b>S<sub>1</sub>-(130°)</b>                |              |            |        |
| Root1 (S <sub>0</sub> )                    | -1200.494666 | -28.176180 | 15.1   |
| Root2 (S <sub>1</sub> ( <sup>1</sup> ππ*)) | -1200.423168 |            | 59.9   |
| Root3                                      | -1200.370217 |            | 93.1   |
| Root4                                      | -1200.343212 |            | 110.1  |
| <b>S<sub>1</sub>-(125°)</b>                |              |            |        |
| Root1 (S <sub>0</sub> )                    | -1200.489192 | -28.176395 | 18.4   |
| Root2 (S <sub>1</sub> ( <sup>1</sup> ππ*)) | -1200.422975 |            | 59.9   |
| Root3                                      | -1200.367891 |            | 94.4   |
| Root4                                      | -1200.339099 |            | 112.5  |
| <b>S<sub>1</sub>-(120°)</b>                |              |            |        |
| Root1 (S <sub>0</sub> )                    | -1200.480195 | -28.174463 | 25.2   |
| Root2 (S <sub>1</sub> ( <sup>1</sup> ππ*)) | -1200.423912 |            | 60.5   |
| Root3                                      | -1200.362428 |            | 99.1   |
| Root4                                      | -1200.331988 |            | 118.2  |
| <b>S<sub>1</sub>-(115°)</b>                |              |            |        |
| Root1 (S <sub>0</sub> )                    | -1200.460898 | -28.171869 | 38.9   |
| Root2 (S <sub>1</sub> ( <sup>1</sup> ππ*)) | -1200.429356 |            | 58.7   |
| Root3                                      | -1200.351798 |            | 107.4  |
| Root4                                      | -1200.317181 |            | 129.1  |
| <b>S<sub>1</sub>-(110°)</b>                |              |            |        |
| Root1 (S <sub>0</sub> )                    | -1200.442327 | -28.174583 | 48.9   |
| Root2 (S <sub>1</sub> ( <sup>1</sup> ππ*)) | -1200.430277 |            | 56.5   |
| Root3                                      | -1200.344080 |            | 110.5  |
| Root4                                      | -1200.317325 |            | 127.3  |
| <b>S<sub>1</sub>-(105°)</b>                |              |            |        |
| Root1 (S <sub>0</sub> )                    | -1200.443464 | -28.180674 | 44.4   |
| Root2 (S <sub>1</sub> ( <sup>1</sup> ππ*)) | -1200.430953 |            | 52.24  |
| Root3                                      | -1200.342955 |            | 107.44 |
| Root4                                      | -1200.324869 |            | 118.74 |
| <b>S<sub>1</sub>-(100°)</b>                |              |            |        |
| Root1 (S <sub>0</sub> )                    | -1200.442202 | -28.180215 | 45.4   |
| Root2 (S <sub>1</sub> ( <sup>1</sup> ππ*)) | -1200.431152 |            | 52.4   |
| Root3                                      | -1200.342284 |            | 108.1  |
| Root4                                      | -1200.327690 |            | 117.3  |
| <b>S<sub>1</sub>-(95°)</b>                 |              |            |        |
| Root1 (S <sub>0</sub> )                    | -1200.441184 | -28.180118 | 46.1   |
| Root2 (S <sub>1</sub> ( <sup>1</sup> ππ*)) | -1200.430484 |            | 52.8   |

|                                              |              |            |       |
|----------------------------------------------|--------------|------------|-------|
| Root3                                        | -1200.341169 |            | 108.9 |
| Root4                                        | -1200.328492 |            | 116.8 |
| <b>S<sub>1</sub>-(90°)</b>                   |              |            |       |
| Root1 (S <sub>0</sub> )                      | -1200.439983 | -28.180847 | 46.4  |
| Root2 (S <sub>1</sub> (1ππ*))                | -1200.429247 |            | 53.2  |
| Root3                                        | -1200.339840 |            | 109.3 |
| Root4                                        | -1200.329574 |            | 115.7 |
| <b>Cl(S<sub>1</sub>/S<sub>0</sub>)-(85°)</b> |              |            |       |
| Root1 (S <sub>0</sub> )                      | -1200.430265 | -28.180023 | 53.0  |
| Root2 (S <sub>1</sub> (1ππ*))                | -1200.435536 |            | 49.7  |
| Root3                                        | -1200.338231 |            | 110.8 |
| Root4                                        | -1200.324136 |            | 119.6 |
| <b>S<sub>1</sub>-(80°)</b>                   |              |            |       |
| Root1 (S <sub>0</sub> )                      | -1200.436677 | -28.179502 | 49.3  |
| Root2 (S <sub>1</sub> (1ππ*))                | -1200.426471 |            | 55.7  |
| Root3                                        | -1200.338193 |            | 111.1 |
| Root4                                        | -1200.318237 |            | 123.7 |
| <b>S<sub>1</sub>-(75°)</b>                   |              |            |       |
| Root1 (S <sub>0</sub> )                      | -1200.433430 | -28.179968 | 51.1  |
| Root2 (S <sub>1</sub> (1ππ*))                | -1200.424271 |            | 56.8  |
| Root3                                        | -1200.336145 |            | 112.1 |
| Root4                                        | -1200.317167 |            | 124.0 |
| <b>S<sub>1</sub>-(70°)</b>                   |              |            |       |
| Root1 (S <sub>0</sub> )                      | -1200.432017 | -28.180116 | 51.9  |
| Root2 (S <sub>1</sub> (1ππ*))                | -1200.422398 |            | 57.9  |
| Root3                                        | -1200.334494 |            | 113.1 |
| Root4                                        | -1200.316406 |            | 124.4 |
| <b>S<sub>1</sub>-(65°)</b>                   |              |            |       |
| Root1 (S <sub>0</sub> )                      | -1200.428825 | -28.179916 | 54.0  |
| Root2 (S <sub>1</sub> (1ππ*))                | -1200.419005 |            | 60.2  |
| Root3                                        | -1200.331083 |            | 115.3 |
| Root4                                        | -1200.316691 |            | 124.4 |
| <b>S<sub>1</sub>-(60°)</b>                   |              |            |       |
| Root1 (S <sub>0</sub> )                      | -1200.425952 | -28.179413 | 56.1  |
| Root2 (S <sub>1</sub> (1ππ*))                | -1200.415751 |            | 62.5  |
| Root3                                        | -1200.328065 |            | 117.5 |
| Root4                                        | -1200.315511 |            | 125.4 |
| <b>S<sub>1</sub>-(55°)</b>                   |              |            |       |
| Root1 (S <sub>0</sub> )                      | -1200.423297 | -28.179399 | 57.8  |
| Root2 (S <sub>1</sub> (1ππ*))                | -1200.412379 |            | 64.6  |
| Root3                                        | -1200.324887 |            | 119.5 |
| Root4                                        | -1200.315526 |            | 125.4 |
| <b>S<sub>1</sub>-(50°)</b>                   |              |            |       |
| Root1 (S <sub>0</sub> )                      | -1200.421286 | -28.179691 | 58.9  |
| Root2 (S <sub>1</sub> (1ππ*))                | -1200.408700 |            | 66.8  |
| Root3                                        | -1200.322046 |            | 121.2 |
| Root4                                        | -1200.313963 |            | 126.2 |
| <b>S<sub>1</sub>-(45°)</b>                   |              |            |       |
| Root1 (S <sub>0</sub> )                      | -1200.419595 | -28.179217 | 60.3  |

|                                            |              |            |       |
|--------------------------------------------|--------------|------------|-------|
| Root2 (S <sub>1</sub> ( <sup>1</sup> ππ*)) | -1200.404733 |            | 69.6  |
| Root3                                      | -1200.319526 |            | 123.0 |
| Root4                                      | -1200.312765 |            | 127.3 |
| <b>S<sub>1</sub>-(40°)</b>                 |              |            |       |
| Root1 (S <sub>0</sub> )                    | -1200.416833 | -28.179634 | 61.7  |
| Root2 (S <sub>1</sub> ( <sup>1</sup> ππ*)) | -1200.399758 |            | 72.4  |
| Root3                                      | -1200.316883 |            | 124.4 |
| Root4                                      | -1200.303701 |            | 132.7 |

**Table S4-2-(I).** Absolute energies (A.E., hartree), relative energies ( $\Delta E$ , kcal/mol), and MM energies (hartree) of optimized structures for ground state relaxation of photoisomerization along the reaction coordinate of C8-C9-C10-C11 and C9-C10-C11-C12 dihedral angle(°) in PYP. The corresponding energy profiles are plotted in Figure 2-(I) of the main article.

| C8C9C10C11<br>C9C10C11C12                  | CASPT2<br>A.E. | MM part    | $\Delta E$ |
|--------------------------------------------|----------------|------------|------------|
| <b>S<sub>0</sub>-(80°)</b>                 |                |            |            |
| Root1 (S <sub>0</sub> )                    | -1200.450041   | -28.174844 | 43.9       |
| Root2 (S <sub>1</sub> ( <sup>1</sup> ππ*)) | -1200.408313   |            | 70.1       |
| Root3                                      | -1200.282033   |            | 149.3      |
| Root4                                      | -1200.295490   |            | 140.9      |
| <b>S<sub>0</sub>-(75°)</b>                 |                |            |            |
| Root1 (S <sub>0</sub> )                    | -1200.448316   | -28.174266 | 45.3       |
| Root2 (S <sub>1</sub> ( <sup>1</sup> ππ*)) | -1200.402582   |            | 74.0       |
| Root3                                      | -1200.285581   |            | 147.5      |
| Root4                                      | -1200.295308   |            | 141.4      |
| <b>S<sub>0</sub>-(70°)</b>                 |                |            |            |
| Root1 (S <sub>0</sub> )                    | -1200.445425   | -28.174453 | 47.0       |
| Root2 (S <sub>1</sub> ( <sup>1</sup> ππ*)) | -1200.394241   |            | 79.2       |
| Root3                                      | -1200.288554   |            | 145.5      |
| Root4                                      | -1200.290304   |            | 144.4      |
| <b>S<sub>0</sub>-(65°)</b>                 |                |            |            |
| Root1 (S <sub>0</sub> )                    | -1200.443738   | -28.17442  | 48.1       |
| Root2 (S <sub>1</sub> ( <sup>1</sup> ππ*)) | -1200.387965   |            | 83.1       |
| Root3                                      | -1200.293245   |            | 142.5      |
| Root4                                      | -1200.289827   |            | 144.7      |
| <b>S<sub>0</sub>-(60°)</b>                 |                |            |            |
| Root1 (S <sub>0</sub> )                    | -1200.440302   | -28.173357 | 50.9       |
| Root2 (S <sub>1</sub> ( <sup>1</sup> ππ*)) | -1200.378246   |            | 89.9       |
| Root3                                      | -1200.294707   |            | 142.3      |
| Root4                                      | -1200.285754   |            | 147.9      |
| <b>S<sub>0</sub>-(55°)</b>                 |                |            |            |
| Root1 (S <sub>0</sub> )                    | -1200.443454   | -28.174294 | 48.4       |
| Root2 (S <sub>1</sub> ( <sup>1</sup> ππ*)) | -1200.374927   |            | 91.4       |

|                               |              |            |       |
|-------------------------------|--------------|------------|-------|
| Root3                         | -1200.304710 |            | 135.4 |
| Root4                         | -1200.288390 |            | 145.7 |
| <b>S<sub>0</sub>-(50°)</b>    |              |            |       |
| Root1 (S <sub>0</sub> )       | -1200.441307 | -28.176702 | 48.2  |
| Root2 (S <sub>1</sub> (1ππ*)) | -1200.368555 |            | 93.9  |
| Root3                         | -1200.301570 |            | 135.9 |
| Root4                         | -1200.289140 |            | 143.7 |
| <b>S<sub>0</sub>-(45°)</b>    |              |            |       |
| Root1 (S <sub>0</sub> )       | -1200.442971 | -28.177059 | 46.9  |
| Root2 (S <sub>1</sub> (1ππ*)) | -1200.367418 |            | 94.3  |
| Root3                         | -1200.293262 |            | 140.9 |
| Root4                         | -1200.301601 |            | 135.6 |
| <b>S<sub>0</sub>-(40°)</b>    |              |            |       |
| Root1 (S <sub>0</sub> )       | -1200.448134 | -28.174781 | 45.1  |
| Root2 (S <sub>1</sub> (1ππ*)) | -1200.365705 |            | 96.9  |
| Root3                         | -1200.289586 |            | 144.6 |
| Root4                         | -1200.299060 |            | 138.7 |
| <b>S<sub>0</sub>-(35°)</b>    |              |            |       |
| Root1 (S <sub>0</sub> )       | -1200.452489 | -28.178131 | 40.3  |
| Root2 (S <sub>1</sub> (1ππ*)) | -1200.369559 |            | 92.3  |
| Root3                         | -1200.291359 |            | 141.4 |
| Root4                         | -1200.308654 |            | 130.6 |
| <b>S<sub>0</sub>-(30°)</b>    |              |            |       |
| Root1 (S <sub>0</sub> )       | -1200.444410 | -28.190357 | 37.7  |
| Root2 (S <sub>1</sub> (1ππ*)) | -1200.372144 |            | 83.0  |
| Root3                         | -1200.291482 |            | 133.7 |
| Root4                         | -1200.303131 |            | 126.3 |
| <b>S<sub>0</sub>-(25°)</b>    |              |            |       |
| Root1 (S <sub>0</sub> )       | -1200.446394 | -28.188511 | 37.6  |
| Root2 (S <sub>1</sub> (1ππ*)) | -1200.372117 |            | 84.2  |
| Root3                         | -1200.290961 |            | 135.1 |
| Root4                         | -1200.306315 |            | 125.5 |
| <b>S<sub>0</sub>-(20°)</b>    |              |            |       |
| Root1 (S <sub>0</sub> )       | -1200.447345 | -28.188119 | 37.3  |
| Root2 (S <sub>1</sub> (1ππ*)) | -1200.374729 |            | 82.8  |
| Root3                         | -1200.293151 |            | 134.0 |
| Root4                         | -1200.309209 |            | 123.9 |
| <b>S<sub>0</sub>-(15°)</b>    |              |            |       |
| Root1 (S <sub>0</sub> )       | -1200.447149 | -28.190418 | 35.9  |
| Root2 (S <sub>1</sub> (1ππ*)) | -1200.374784 |            | 81.3  |
| Root3                         | -1200.293045 |            | 132.6 |
| Root4                         | -1200.309226 |            | 122.5 |
| <b>S<sub>0</sub>-(10°)</b>    |              |            |       |
| Root1 (S <sub>0</sub> )       | -1200.446808 | -28.192861 | 34.6  |
| Root2 (S <sub>1</sub> (1ππ*)) | -1200.375905 |            | 79.1  |
| Root3                         | -1200.293798 |            | 130.6 |
| Root4                         | -1200.309269 |            | 120.9 |
| <b>S<sub>0</sub>-(5°)</b>     |              |            |       |
| Root1 (S <sub>0</sub> )       | -1200.451621 | -28.192601 | 31.8  |

|                                            |              |            |       |
|--------------------------------------------|--------------|------------|-------|
| Root2 (S <sub>1</sub> ( <sup>1</sup> ππ*)) | -1200.376926 |            | 78.6  |
| Root3                                      | -1200.295910 |            | 129.5 |
| Root4                                      | -1200.312454 |            | 119.1 |
| <b>S<sub>0</sub>-(0°)</b>                  |              |            |       |
| Root1 (S <sub>0</sub> )                    | -1200.453110 |            | 29.6  |
| Root2 (S <sub>1</sub> ( <sup>1</sup> ππ*)) | -1200.378095 | -28.194486 | 76.7  |
| Root3                                      | -1200.297324 |            | 127.4 |
| Root4                                      | -1200.313610 |            | 117.2 |
| <b>S<sub>0</sub>-(-9.6°)</b>               |              |            |       |
| Root1 (S <sub>0</sub> )                    | -1200.472898 |            | 23.6  |
| Root2 (S <sub>1</sub> ( <sup>1</sup> ππ*)) | -1200.379944 | -28.184370 | 81.9  |
| Root3                                      | -1200.323978 |            | 117.0 |
| Root4                                      | -1200.327529 |            | 114.8 |

**Table S4-2-(II).** Absolute energies (A.E., hartree), relative energies ( $\Delta E$ , kcal/mol), and MM energies (hartree) of optimized structures for ground state relaxation of photoisomerization along the reaction coordinate of C9-C10-C11-C12 and C11-C12-S13-C14 dihedral angle(°) in PYP. The corresponding energy profiles are plotted in Figure 2-(II) of the main article.

| C9C10C11C12<br>C11C12S13C14                | CASPT2<br>A.E. | MM part    | $\Delta E$ |
|--------------------------------------------|----------------|------------|------------|
| <b>S<sub>0</sub>-(80°)</b>                 |                |            |            |
| Root1 (S <sub>0</sub> )                    | -1200.449224   | -28.179779 | 41.3       |
| Root2 (S <sub>1</sub> ( <sup>1</sup> ππ*)) | -1200.408851   |            | 66.6       |
| Root3                                      | -1200.278605   |            | 148.4      |
| Root4                                      | -1200.295739   |            | 137.6      |
| <b>S<sub>0</sub>-(75°)</b>                 |                |            |            |
| Root1 (S <sub>0</sub> )                    | -1200.452839   | -28.174501 | 42.3       |
| Root2 (S <sub>1</sub> ( <sup>1</sup> ππ*)) | -1200.405437   |            | 72.1       |
| Root3                                      | -1200.323079   |            | 123.7      |
| Root4                                      | -1200.288707   |            | 145.3      |
| <b>S<sub>0</sub>-(70°)</b>                 |                |            |            |
| Root1 (S <sub>0</sub> )                    | -1200.451882   | -28.170052 | 45.7       |
| Root2 (S <sub>1</sub> ( <sup>1</sup> ππ*)) | -1200.403422   |            | 76.1       |
| Root3                                      | -1200.292962   |            | 145.4      |
| Root4                                      | -1200.301682   |            | 140.0      |
| <b>S<sub>0</sub>-(65°)</b>                 |                |            |            |
| Root1 (S <sub>0</sub> )                    | -1200.457913   | -28.164088 | 45.7       |
| Root2 (S <sub>1</sub> ( <sup>1</sup> ππ*)) | -1200.400716   |            | 81.6       |
| Root3                                      | -1200.324133   |            | 129.6      |
| Root4                                      | -1200.292575   |            | 149.4      |
| <b>S<sub>0</sub>-(60°)</b>                 |                |            |            |
| Root1 (S <sub>0</sub> )                    | -1200.469460   | -28.169439 | 35.1       |
| Root2 (S <sub>1</sub> ( <sup>1</sup> ππ*)) | -1200.398379   |            | 79.7       |

|                               |              |            |       |
|-------------------------------|--------------|------------|-------|
| Root3                         | -1200.336241 |            | 118.7 |
| Root4                         | -1200.305861 |            | 137.8 |
| <b>S<sub>0</sub>-(55°)</b>    |              |            |       |
| Root1 (S <sub>0</sub> )       | -1200.477653 | -28.179914 | 23.4  |
| Root2 (S <sub>1</sub> (1ππ*)) | -1200.398559 |            | 73.0  |
| Root3                         | -1200.343801 |            | 107.4 |
| Root4                         | -1200.316092 |            | 124.8 |
| <b>S<sub>0</sub>-(50°)</b>    |              |            |       |
| Root1 (S <sub>0</sub> )       | -1200.478490 | -28.185060 | 19.6  |
| Root2 (S <sub>1</sub> (1ππ*)) | -1200.390142 |            | 75.1  |
| Root3                         | -1200.321332 |            | 118.2 |
| Root4                         | -1200.327883 |            | 114.1 |
| <b>S<sub>0</sub>-(45°)</b>    |              |            |       |
| Root1 (S <sub>0</sub> )       | -1200.484505 | -28.184874 | 16.0  |
| Root2 (S <sub>1</sub> (1ππ*)) | -1200.388657 |            | 76.1  |
| Root3                         | -1200.336421 |            | 108.9 |
| Root4                         | -1200.330302 |            | 112.7 |
| <b>S<sub>0</sub>-(40°)</b>    |              |            |       |
| Root1 (S <sub>0</sub> )       | -1200.485767 | -28.185681 | 14.7  |
| Root2 (S <sub>1</sub> (1ππ*)) | -1200.390796 |            | 74.3  |
| Root3                         | -1200.337147 |            | 107.9 |
| Root4                         | -1200.331985 |            | 111.2 |
| <b>S<sub>0</sub>-(35°)</b>    |              |            |       |
| Root1 (S <sub>0</sub> )       | -1200.486302 | -28.184922 | 14.8  |
| Root2 (S <sub>1</sub> (1ππ*)) | -1200.391212 |            | 74.5  |
| Root3                         | -1200.338175 |            | 107.8 |
| Root4                         | -1200.332359 |            | 111.4 |
| <b>S<sub>0</sub>-(30°)</b>    |              |            |       |
| Root1 (S <sub>0</sub> )       | -1200.488202 | -28.184863 | 13.7  |
| Root2 (S <sub>1</sub> (1ππ*)) | -1200.394032 |            | 72.8  |
| Root3                         | -1200.338767 |            | 107.4 |
| Root4                         | -1200.333967 |            | 110.4 |
| <b>S<sub>0</sub>-(25°)</b>    |              |            |       |
| Root1 (S <sub>0</sub> )       | -1200.489531 | -28.185203 | 12.6  |
| Root2 (S <sub>1</sub> (1ππ*)) | -1200.395554 |            | 71.6  |
| Root3                         | -1200.339705 |            | 106.6 |
| Root4                         | -1200.334720 |            | 109.8 |
| <b>S<sub>0</sub>-(20°)</b>    |              |            |       |
| Root1 (S <sub>0</sub> )       | -1200.490305 | -28.185228 | 12.1  |
| Root2 (S <sub>1</sub> (1ππ*)) | -1200.396986 |            | 70.7  |
| Root3                         | -1200.340040 |            | 106.4 |
| Root4                         | -1200.335003 |            | 109.6 |
| <b>S<sub>0</sub>-(15°)</b>    |              |            |       |
| Root1 (S <sub>0</sub> )       | -1200.490858 | -28.186945 | 10.7  |
| Root2 (S <sub>1</sub> (1ππ*)) | -1200.398527 |            | 68.6  |
| Root3                         | -1200.340053 |            | 105.3 |
| Root4                         | -1200.334837 |            | 108.6 |
| <b>S<sub>0</sub>-(10°)</b>    |              |            |       |
| Root1 (S <sub>0</sub> )       | -1200.491899 | -28.188541 | 9.0   |



|                                            |              |            |       |
|--------------------------------------------|--------------|------------|-------|
| Root2 (S <sub>1</sub> ( <sup>1</sup> ππ*)) | -1200.398918 |            | 67.4  |
| Root3                                      | -1200.340432 |            | 104.1 |
| Root4                                      | -1200.334716 |            | 107.7 |
| <b>S<sub>0</sub>-(5°)</b>                  |              |            |       |
| Root1 (S <sub>0</sub> )                    | -1200.497236 |            | 4.6   |
| Root2 (S <sub>1</sub> ( <sup>1</sup> ππ*)) | -1200.399281 | -28.190311 | 66.0  |
| Root3                                      | -1200.343916 |            | 100.8 |
| Root4                                      | -1200.338045 |            | 104.5 |
| <b>S<sub>0</sub>-(0°)</b>                  |              |            |       |
| Root1 (S <sub>0</sub> )                    | -1200.498805 |            | 2.4   |
| Root2 (S <sub>1</sub> ( <sup>1</sup> ππ*)) | -1200.399290 | -28.192148 | 64.9  |
| Root3                                      | -1200.345445 |            | 98.7  |
| Root4                                      | -1200.339375 |            | 102.5 |

**Table S4-2-(III).** Absolute energies (A.E., hartree), relative energies ( $\Delta E$ , kcal/mol), and MM energies (hartree) of optimized structures for ground state relaxation of photoisomerization along the reaction coordinate of C9-C10-C11-C12 and C11-C12-S13-C14 dihedral angle(°) in PYP. The corresponding energy profiles are plotted in Figure 2-(III) of the main article.

| (OBF)C9C10C11C12                           | CASPT2<br>A.E. | MM part    | $\Delta E$ |
|--------------------------------------------|----------------|------------|------------|
| <b>S<sub>0</sub>-(80°)</b>                 |                |            |            |
| Root1 (S <sub>0</sub> )                    | -1200.449486   | -28.172972 | 45.4       |
| Root2 (S <sub>1</sub> ( <sup>1</sup> ππ*)) | -1200.409095   |            | 70.8       |
| Root3                                      | -1200.279174   |            | 152.3      |
| Root4                                      | -1200.295082   |            | 142.3      |
| <b>S<sub>0</sub>-(75°)</b>                 |                |            |            |
| Root1 (S <sub>0</sub> )                    | -1200.449183   | -28.171141 | 46.8       |
| Root2 (S <sub>1</sub> ( <sup>1</sup> ππ*)) | -1200.406571   |            | 73.5       |
| Root3                                      | -1200.281776   |            | 151.8      |
| Root4                                      | -1200.299512   |            | 140.7      |
| <b>S<sub>0</sub>-(70°)</b>                 |                |            |            |
| Root1 (S <sub>0</sub> )                    | -1200.449429   | -28.167898 | 48.6       |
| Root2 (S <sub>1</sub> ( <sup>1</sup> ππ*)) | -1200.402676   |            | 78.0       |
| Root3                                      | -1200.293876   |            | 146.2      |
| Root4                                      | -1200.294896   |            | 145.6      |
| <b>S<sub>0</sub>-(65°)</b>                 |                |            |            |
| Root1 (S <sub>0</sub> )                    | -1200.462417   | -28.171206 | 38.4       |
| Root2 (S <sub>1</sub> ( <sup>1</sup> ππ*)) | -1200.401285   |            | 76.8       |
| Root3                                      | -1200.328172   |            | 122.6      |
| Root4                                      | -1200.297847   |            | 141.7      |
| <b>S<sub>0</sub>-(60°)</b>                 |                |            |            |
| Root1 (S <sub>0</sub> )                    | -1200.469888   | -28.172478 | 32.9       |
| Root2 (S <sub>1</sub> ( <sup>1</sup> ππ*)) | -1200.397924   |            | 78.1       |

|                               |              |            |       |
|-------------------------------|--------------|------------|-------|
| Root3                         | -1200.336208 |            | 116.8 |
| Root4                         | -1200.306266 |            | 135.6 |
| <b>S<sub>0</sub>-(55°)</b>    |              |            |       |
| Root1 (S <sub>0</sub> )       | -1200.475573 | -28.17342  | 28.8  |
| Root2 (S <sub>1</sub> (1ππ*)) | -1200.396904 |            | 78.1  |
| Root3                         | -1200.340864 |            | 113.3 |
| Root4                         | -1200.312657 |            | 131.0 |
| <b>S<sub>0</sub>-(50°)</b>    |              |            |       |
| Root1 (S <sub>0</sub> )       | -1200.479343 | -28.181937 | 21.1  |
| Root2 (S <sub>1</sub> (1ππ*)) | -1200.378376 |            | 84.4  |
| Root3                         | -1200.335972 |            | 111.0 |
| Root4                         | -1200.320779 |            | 120.6 |
| <b>S<sub>0</sub>-(45°)</b>    |              |            |       |
| Root1 (S <sub>0</sub> )       | -1200.479670 | -28.183323 | 20.0  |
| Root2 (S <sub>1</sub> (1ππ*)) | -1200.375171 |            | 85.6  |
| Root3                         | -1200.336321 |            | 109.9 |
| Root4                         | -1200.317581 |            | 121.7 |
| <b>S<sub>0</sub>-(40°)</b>    |              |            |       |
| Root1 (S <sub>0</sub> )       | -1200.481302 | -28.182044 | 19.8  |
| Root2 (S <sub>1</sub> (1ππ*)) | -1200.376688 |            | 85.4  |
| Root3                         | -1200.337968 |            | 109.7 |
| Root4                         | -1200.318382 |            | 122.0 |
| <b>S<sub>0</sub>-(35°)</b>    |              |            |       |
| Root1 (S <sub>0</sub> )       | -1200.481052 | -28.182378 | 19.7  |
| Root2 (S <sub>1</sub> (1ππ*)) | -1200.373940 |            | 86.9  |
| Root3                         | -1200.337462 |            | 109.8 |
| Root4                         | -1200.314767 |            | 124.1 |
| <b>S<sub>0</sub>-(30°)</b>    |              |            |       |
| Root1 (S <sub>0</sub> )       | -1200.480636 | -28.183310 | 19.4  |
| Root2 (S <sub>1</sub> (1ππ*)) | -1200.371832 |            | 87.7  |
| Root3                         | -1200.336541 |            | 109.8 |
| Root4                         | -1200.311650 |            | 125.4 |
| <b>S<sub>0</sub>-(25°)</b>    |              |            |       |
| Root1 (S <sub>0</sub> )       | -1200.481196 | -28.182282 | 19.7  |
| Root2 (S <sub>1</sub> (1ππ*)) | -1200.372042 |            | 88.2  |
| Root3                         | -1200.336865 |            | 110.2 |
| Root4                         | -1200.311773 |            | 126.0 |
| <b>S<sub>0</sub>-(20°)</b>    |              |            |       |
| Root1 (S <sub>0</sub> )       | -1200.481617 | -28.180622 | 20.5  |
| Root2 (S <sub>1</sub> (1ππ*)) | -1200.370621 |            | 90.1  |
| Root3                         | -1200.336966 |            | 111.2 |
| Root4                         | -1200.309176 |            | 128.7 |
| <b>S<sub>0</sub>-(15°)</b>    |              |            |       |
| Root1 (S <sub>0</sub> )       | -1200.479920 | -28.181571 | 20.9  |
| Root2 (S <sub>1</sub> (1ππ*)) | -1200.366034 |            | 92.4  |
| Root3                         | -1200.334340 |            | 112.3 |
| Root4                         | -1200.302085 |            | 132.5 |
| <b>S<sub>0</sub>-(10°)</b>    |              |            |       |
| Root1 (S <sub>0</sub> )       | -1200.479846 | -28.18118  | 21.2  |

|                                            |              |            |                        |
|--------------------------------------------|--------------|------------|------------------------|
| Root2 (S <sub>1</sub> ( <sup>1</sup> ππ*)) | -1200.365881 |            | 92.7                   |
| Root3                                      | -1200.334181 |            | 112.6                  |
| Root4                                      | -1200.302192 |            | 132.7                  |
| <b>S<sub>0</sub>(-8.8°)</b>                |              |            |                        |
| Root1 (S <sub>0</sub> )                    | -1200.478848 |            | 21.1                   |
| Root2 (S <sub>1</sub> ( <sup>1</sup> ππ*)) | -1200.364891 | -28.182332 | 92.6                   |
| Root3                                      | -1200.332778 |            | 112.8                  |
| Root4                                      | -1200.299056 |            | 133.9                  |
| <b>(OBF)C11C12S13C14</b>                   |              |            | <b>CASPT2<br/>A.E.</b> |
| <b>S<sub>0</sub>(-130°)</b>                |              |            |                        |
| Root1 (S <sub>0</sub> )                    | -1200.479940 |            | 19.7                   |
| Root2 (S <sub>1</sub> ( <sup>1</sup> ππ*)) | -1200.364500 | -28.183422 | 92.2                   |
| Root3                                      | -1200.334035 |            | 111.3                  |
| Root4                                      | -1200.299418 |            | 133.0                  |
| <b>S<sub>0</sub>(-125°)</b>                |              |            |                        |
| Root1 (S <sub>0</sub> )                    | -1200.480798 |            | 19.8                   |
| Root2 (S <sub>1</sub> ( <sup>1</sup> ππ*)) | -1200.364485 | -28.182491 | 92.8                   |
| Root3                                      | -1200.335216 |            | 111.1                  |
| Root4                                      | -1200.299850 |            | 133.3                  |
| <b>S<sub>0</sub>(-120°)</b>                |              |            |                        |
| Root1 (S <sub>0</sub> )                    | -1200.479657 |            | 20.5                   |
| Root2 (S <sub>1</sub> ( <sup>1</sup> ππ*)) | -1200.360139 | -28.182508 | 95.5                   |
| Root3                                      | -1200.333694 |            | 112.1                  |
| Root4                                      | -1200.295203 |            | 136.2                  |
| <b>S<sub>0</sub>(-115°)</b>                |              |            |                        |
| Root1 (S <sub>0</sub> )                    | -1200.479044 |            | 21.9                   |
| Root2 (S <sub>1</sub> ( <sup>1</sup> ππ*)) | -1200.356877 | -28.180962 | 98.5                   |
| Root3                                      | -1200.334116 |            | 112.8                  |
| Root4                                      | -1200.292564 |            | 138.9                  |
| <b>S<sub>0</sub>(-110°)</b>                |              |            |                        |
| Root1 (S <sub>0</sub> )                    | -1200.478629 |            | 23.1                   |
| Root2 (S <sub>1</sub> ( <sup>1</sup> ππ*)) | -1200.354889 | -28.179392 | 100.7                  |
| Root3                                      | -1200.334711 |            | 113.4                  |
| Root4                                      | -1200.290565 |            | 141.1                  |
| <b>S<sub>0</sub>(-105°)</b>                |              |            |                        |
| Root1 (S <sub>0</sub> )                    | -1200.478084 |            | 24.8                   |
| Root2 (S <sub>1</sub> ( <sup>1</sup> ππ*)) | -1200.352859 | -28.177195 | 103.4                  |
| Root3                                      | -1200.338221 |            | 112.6                  |
| Root4                                      | -1200.289491 |            | 143.2                  |
| <b>S<sub>0</sub>(-100°)</b>                |              |            |                        |
| Root1 (S <sub>0</sub> )                    | -1200.477145 |            | 26.4                   |
| Root2 (S <sub>1</sub> ( <sup>1</sup> ππ*)) | -1200.349888 | -28.175576 | 106.3                  |
| Root3                                      | -1200.340286 |            | 112.3                  |
| Root4                                      | -1200.286558 |            | 146.0                  |
| <b>S<sub>0</sub>(-95°)</b>                 |              |            |                        |
| Root1 (S <sub>0</sub> )                    | -1200.476780 |            | 28.0                   |
| Root2 (S <sub>1</sub> ( <sup>1</sup> ππ*)) | -1200.350925 | -28.173367 | 107.0                  |
| Root3                                      | -1200.341634 |            | 112.8                  |

|                                            |              |            |       |
|--------------------------------------------|--------------|------------|-------|
| Root4                                      | -1200.288111 |            | 146.4 |
| <b>S<sub>0</sub>-(-90°)</b>                |              |            |       |
| Root1 (S <sub>0</sub> )                    | -1200.475430 | -28.169649 | 31.2  |
| Root2 (S <sub>1</sub> ( <sup>1</sup> ππ*)) | -1200.344553 |            | 113.3 |
| Root3                                      | -1200.352853 |            | 108.1 |
| Root4                                      | -1200.282036 |            | 152.6 |
| <b>S<sub>0</sub>-(-85°)</b>                |              |            |       |
| Root1 (S <sub>0</sub> )                    | -1200.473122 | -28.16797  | 33.7  |
| Root2 (S <sub>1</sub> ( <sup>1</sup> ππ*)) | -1200.337449 |            | 118.9 |
| Root3                                      | -1200.389264 |            | 86.3  |
| Root4                                      | -1200.275070 |            | 158.0 |
| <b>S<sub>0</sub>-(-80°)</b>                |              |            |       |
| Root1 (S <sub>0</sub> )                    | -1200.473567 | -28.163913 | 36.0  |
| Root2 (S <sub>1</sub> ( <sup>1</sup> ππ*)) | -1200.341290 |            | 119.0 |
| Root3                                      | -1200.360508 |            | 106.9 |
| Root4                                      | -1200.279017 |            | 158.1 |
| <b>S<sub>0</sub>-(-75°)</b>                |              |            |       |
| Root1 (S <sub>0</sub> )                    | -1200.472643 | -28.162043 | 37.7  |
| Root2 (S <sub>1</sub> ( <sup>1</sup> ππ*)) | -1200.341230 |            | 120.2 |
| Root3                                      | -1200.340989 |            | 120.4 |
| <b>S<sub>0</sub>-(-70°)</b>                |              |            |       |
| Root1 (S <sub>0</sub> )                    | -1200.472228 | -28.157918 | 40.6  |
| Root2 (S <sub>1</sub> ( <sup>1</sup> ππ*)) | -1200.340408 |            | 123.3 |
| Root3                                      | -1200.359331 |            | 111.4 |
| Root4                                      | -1200.277410 |            | 162.8 |
| <b>S<sub>0</sub>-(-65°)</b>                |              |            |       |
| Root1 (S <sub>0</sub> )                    | -1200.473324 | -28.158179 | 39.7  |
| Root2 (S <sub>1</sub> ( <sup>1</sup> ππ*)) | -1200.348529 |            | 118.0 |
| Root3                                      | -1200.340202 |            | 123.3 |
| Root4                                      | -1200.285317 |            | 157.7 |
| <b>S<sub>0</sub>-(-60°)</b>                |              |            |       |
| Root1 (S <sub>0</sub> )                    | -1200.495406 | -28.185342 | 8.8   |
| Root2 (S <sub>1</sub> ( <sup>1</sup> ππ*)) | -1200.394851 |            | 71.9  |
| Root3                                      | -1200.342663 |            | 104.7 |
| Root4                                      | -1200.334764 |            | 109.6 |
| <b>S<sub>0</sub>-(-55°)</b>                |              |            |       |
| Root1 (S <sub>0</sub> )                    | -1200.499311 | -28.187677 | 4.9   |
| Root2 (S <sub>1</sub> ( <sup>1</sup> ππ*)) | -1200.398634 |            | 68.1  |
| Root3                                      | -1200.346041 |            | 101.1 |
| Root4                                      | -1200.338971 |            | 105.5 |

**Table S4-3-(I).** Absolute energies (A.E., hartree), relative energies ( $\Delta E$ , kcal/mol), and MM energies (hartree) of optimized structures for ground state relaxation of BP isomerization along the reaction coordinate of C11-C12-S13-C14 and S13-C14-C15-C16 dihedral angle(°) in PYP. The corresponding energy profiles are plotted in Figure 3 of the main article.

| (BP) C11C12S13C14<br>S13C14C15C16          | CASPT2<br>A.E. | MM part    | $\Delta E$ |
|--------------------------------------------|----------------|------------|------------|
| <b>S<sub>0</sub>-(-55°)</b>                |                |            |            |
| Root1 (S <sub>0</sub> )                    | -1407.852591   | -28.191908 | 0.0        |
| Root2 (S <sub>1</sub> ( <sup>1</sup> ππ*)) | -1407.757244   |            | 59.8       |
| Root3                                      | -1407.696373   |            | 98.0       |
| Root4                                      | -1407.690397   |            | 101.8      |
| <b>S<sub>0</sub>-(-60°)</b>                |                |            |            |
| Root1 (S <sub>0</sub> )                    | -1407.858980   | -28.180427 | 3.2        |
| Root2 (S <sub>1</sub> ( <sup>1</sup> ππ*)) | -1407.766104   |            | 61.5       |
| Root3                                      | -1407.704596   |            | 100.1      |
| Root4                                      | -1407.697510   |            | 104.5      |
| <b>S<sub>0</sub>-(-70°)</b>                |                |            |            |
| Root1 (S <sub>0</sub> )                    | -1407.858221   | -28.175947 | 6.5        |
| Root2 (S <sub>1</sub> ( <sup>1</sup> ππ*)) | -1407.766736   |            | 63.9       |
| Root3                                      | -1407.706558   |            | 101.7      |
| Root4                                      | -1407.700792   |            | 105.3      |
| <b>S<sub>0</sub>-(-80°)</b>                |                |            |            |
| Root1 (S <sub>0</sub> )                    | -1407.858081   | -28.170274 | 10.1       |
| Root2 (S <sub>1</sub> ( <sup>1</sup> ππ*)) | -1407.773261   |            | 63.4       |
| Root3                                      | -1407.707981   |            | 104.3      |
| Root4                                      | -1407.703967   |            | 106.8      |
| <b>S<sub>0</sub>-(-90°)</b>                |                |            |            |
| Root1 (S <sub>0</sub> )                    | -1407.853267   | -28.173559 | 11.1       |
| Root2 (S <sub>1</sub> ( <sup>1</sup> ππ*)) | -1407.767552   |            | 64.9       |
| Root3                                      | -1407.702117   |            | 105.9      |
| Root4                                      | -1407.699913   |            | 107.3      |
| <b>S<sub>0</sub>-(-100°)</b>               |                |            |            |
| Root1 (S <sub>0</sub> )                    | -1407.851199   | -28.173837 | 12.2       |
| Root2 (S <sub>1</sub> ( <sup>1</sup> ππ*)) | -1407.764266   |            | 66.8       |
| Root3                                      | -1407.700247   |            | 106.9      |
| Root4                                      | -1407.697348   |            | 108.8      |
| <b>S<sub>0</sub>-(-110°)</b>               |                |            |            |
| Root1 (S <sub>0</sub> )                    | -1407.844847   | -28.17378  | 16.2       |
| Root2 (S <sub>1</sub> ( <sup>1</sup> ππ*)) | -1407.754837   |            | 72.7       |
| Root3                                      | -1407.693932   |            | 110.9      |
| Root4                                      | -1407.692441   |            | 111.9      |
| <b>S<sub>0</sub>-(-120°)</b>               |                |            |            |
| Root1 (S <sub>0</sub> )                    | -1407.845545   | -28.178365 | 12.9       |
| Root2 (S <sub>1</sub> ( <sup>1</sup> ππ*)) | -1407.754976   |            | 69.8       |
| Root3                                      | -1407.689227   |            | 111.0      |
| Root4                                      | -1407.689925   |            | 110.6      |
| <b>S<sub>0</sub>-(-130°)</b>               |                |            |            |
| Root1 (S <sub>0</sub> )                    | -1407.847671   | -28.179951 | 10.6       |
| Root2 (S <sub>1</sub> ( <sup>1</sup> ππ*)) | -1407.754693   |            | 68.9       |
| Root3                                      | -1407.690880   |            | 109.0      |
| Root4                                      | -1407.690537   |            | 109.2      |

|                                            |              |            |       |
|--------------------------------------------|--------------|------------|-------|
| <b>S<sub>0</sub>-(-140°)</b>               |              |            |       |
| Root1 (S <sub>0</sub> )                    | -1407.850729 | -28.18523  | 5.4   |
| Root2 (S <sub>1</sub> ( <sup>1</sup> ππ*)) | -1407.755955 |            | 64.8  |
| Root3                                      | -1407.694418 |            | 103.4 |
| Root4                                      | -1407.692907 |            | 104.4 |
| <b>S<sub>0</sub>-(-150°)</b>               |              |            |       |
| Root1 (S <sub>0</sub> )                    | -1407.853960 | -28.188307 | 1.4   |
| Root2 (S <sub>1</sub> ( <sup>1</sup> ππ*)) | -1407.757885 |            | 61.7  |
| Root3                                      | -1407.698245 |            | 99.1  |
| Root4                                      | -1407.696503 |            | 100.2 |
| <b>S<sub>0</sub>-(-160°)</b>               |              |            |       |
| Root1 (S <sub>0</sub> )                    | -1407.859380 | -28.196450 | -7.1  |
| Root2 (S <sub>1</sub> ( <sup>1</sup> ππ*)) | -1407.761785 |            | 54.1  |
| Root3                                      | -1407.702682 |            | 91.2  |
| Root4                                      | -1407.700811 |            | 92.4  |
| <b>S<sub>0</sub>-(-170°)</b>               |              |            |       |
| Root1 (S <sub>0</sub> )                    | -1407.863975 | -28.195800 | -9.6  |
| Root2 (S <sub>1</sub> ( <sup>1</sup> ππ*)) | -1407.766911 |            | 51.3  |
| Root3                                      | -1407.708036 |            | 88.3  |
| Root4                                      | -1407.706895 |            | 89.0  |
| <b>S<sub>0</sub>-(-175°)</b>               |              |            |       |
| Root1 (S <sub>0</sub> )                    | -1407.865855 | -28.195814 | -10.8 |
| Root2 (S <sub>1</sub> ( <sup>1</sup> ππ*)) | -1407.768479 |            | 50.3  |
| Root3                                      | -1407.712209 |            | 85.6  |
| Root4                                      | -1407.709500 |            | 87.3  |

**Table S4-3-(II).** Absolute energies (A.E., hartree), relative energies ( $\Delta E$ , kcal/mol), and MM energies (hartree) of optimized structures for proton transfer (reaction coordinate: O3-H4 distance) in PYP. The corresponding energy profiles are plotted in Figure 3 of the main article.

| O3-H4                                      | CASPT2<br>A.E. | MM part    | $\Delta E$ |
|--------------------------------------------|----------------|------------|------------|
| <b>S<sub>0</sub>- (1.1Å)</b>               |                |            |            |
| Root1 (S <sub>0</sub> )                    | -1407.864193   | -28.196036 | -9.9       |
| Root2 (S <sub>1</sub> ( <sup>1</sup> ππ*)) | -1407.764400   |            | 52.8       |
| Root3                                      | -1407.712638   |            | 85.2       |
| Root4                                      | -1407.705088   |            | 90.0       |
| <b>S<sub>0</sub>- (1.2Å)</b>               |                |            |            |
| Root1 (S <sub>0</sub> )                    | -1407.861722   | -28.192794 | -6.3       |
| Root2 (S <sub>1</sub> ( <sup>1</sup> ππ*)) | -1407.752380   |            | 62.3       |
| Root3                                      | -1407.710925   |            | 88.3       |
| Root4                                      | -1407.689959   |            | 101.5      |
| <b>S<sub>0</sub>- (1.3Å)</b>               |                |            |            |
| Root1 (S <sub>0</sub> )                    | -1407.859203   | -28.192788 | -4.7       |
| Root2 (S <sub>1</sub> ( <sup>1</sup> ππ*)) | -1407.743913   |            | 67.6       |

|                                            |              |            |       |
|--------------------------------------------|--------------|------------|-------|
| Root3                                      | -1407.710112 |            | 88.9  |
| Root4                                      | -1407.678396 |            | 108.8 |
| <b>S<sub>0</sub>-(1.4Å)</b>                |              |            |       |
| Root1 (S <sub>0</sub> )                    | -1407.858432 | -28.195615 | -6.0  |
| Root2 (S <sub>1</sub> ( <sup>1</sup> ππ*)) | -1407.738750 |            | 69.1  |
| Root3                                      | -1407.708511 |            | 88.1  |
| Root4                                      | -1407.672878 |            | 110.4 |
| <b>S<sub>0</sub>-(1.51Å)</b>               |              |            |       |
| Root1 (S <sub>0</sub> )                    | -1407.858392 | -28.196505 | -6.5  |
| Root2 (S <sub>1</sub> ( <sup>1</sup> ππ*)) | -1407.730334 |            | 73.8  |
| Root3                                      | -1407.712505 |            | 85.0  |
| Root4                                      | -1407.669672 |            | 111.9 |

**Table S4-4-(I).** Absolute energies (A.E., hartree), relative energies ( $\Delta E$ , kcal/mol), and MM energies (hartree) of optimized structures for ground state relaxation of BP isomerization along the reaction coordinate of C10-C11-C12-S13 and C12-S13-C14-C15 dihedral angle(°) in PYP. The corresponding energy profiles are plotted in Figure 4-(I) of the main article.

| (BP) C10C11C12S13<br>C12S13C14C15          | CASPT2<br>A.E. | MM part    | $\Delta E$ |
|--------------------------------------------|----------------|------------|------------|
| <b>S<sub>0</sub>-(-173°)</b>               |                |            |            |
| Root1 (S <sub>0</sub> )                    | -1407.858392   | -28.196505 | -6.5       |
| Root2 (S <sub>1</sub> ( <sup>1</sup> ππ*)) | -1407.730334   |            | 73.8       |
| <b>S<sub>0</sub>-(-170°)</b>               |                |            |            |
| Root1 (S <sub>0</sub> )                    | -1407.853091   | -28.198484 | -4.4       |
| Root2 (S <sub>1</sub> ( <sup>1</sup> ππ*)) | -1407.713886   |            | 82.9       |
| <b>S<sub>0</sub>-(-160°)</b>               |                |            |            |
| Root1 (S <sub>0</sub> )                    | -1407.846626   | -28.204338 | -4.1       |
| Root2 (S <sub>1</sub> ( <sup>1</sup> ππ*)) | -1407.700777   |            | 87.5       |
| <b>S<sub>0</sub>-(-150°)</b>               |                |            |            |
| Root1 (S <sub>0</sub> )                    | -1407.843708   | -28.204449 | -2.3       |
| Root2 (S <sub>1</sub> ( <sup>1</sup> ππ*)) | -1407.697265   |            | 89.6       |
| <b>S<sub>0</sub>-(-140°)</b>               |                |            |            |
| Root1 (S <sub>0</sub> )                    | -1407.837971   | -28.202006 | 2.8        |
| Root2 (S <sub>1</sub> ( <sup>1</sup> ππ*)) | -1407.689201   |            | 96.2       |
| <b>S<sub>0</sub>-(-130°)</b>               |                |            |            |
| Root1 (S <sub>0</sub> )                    | -1407.833545   | -28.201168 | 6.1        |
| Root2 (S <sub>1</sub> ( <sup>1</sup> ππ*)) | -1407.683763   |            | 100.1      |
| <b>S<sub>0</sub>-(-120°)</b>               |                |            |            |
| Root1 (S <sub>0</sub> )                    | -1407.828987   | -28.197640 | 11.2       |
| Root2 (S <sub>1</sub> ( <sup>1</sup> ππ*)) | -1407.677724   |            | 106.1      |
| <b>S<sub>0</sub>-(-110°)</b>               |                |            |            |
| Root1 (S <sub>0</sub> )                    | -1407.835579   | -28.189391 | 12.3       |
| Root2 (S <sub>1</sub> ( <sup>1</sup> ππ*)) | -1407.683518   |            | 107.7      |

|                                            |                        |                |           |
|--------------------------------------------|------------------------|----------------|-----------|
| <b>S<sub>0</sub>-(-100°)</b>               |                        |                |           |
| Root1 (S <sub>0</sub> )                    | -1407.824374           | -28.198585     | 13.5      |
| Root2 (S <sub>1</sub> ( <sup>1</sup> ππ*)) | -1407.665681           |                | 113.1     |
| <b>S<sub>0</sub>-(-90°)</b>                |                        |                |           |
| Root1 (S <sub>0</sub> )                    | -1407.817266           | -28.197965     | 18.4      |
| Root2 (S <sub>1</sub> ( <sup>1</sup> ππ*)) | -1407.656686           |                | 119.1     |
| <b>S<sub>0</sub>-(-80°)</b>                |                        |                |           |
| Root1 (S <sub>0</sub> )                    | -1407.814057           | -28.198372     | 20.1      |
| Root2 (S <sub>1</sub> ( <sup>1</sup> ππ*)) | -1407.653673           |                | 120.8     |
| <b>S<sub>0</sub>-(-70°)</b>                |                        |                |           |
| Root1 (S <sub>0</sub> )                    | -1407.816430           | -28.198382     | 18.6      |
| Root2 (S <sub>1</sub> ( <sup>1</sup> ππ*)) | -1407.657948           |                | 118.1     |
| <b>S<sub>0</sub>-(-60°)</b>                |                        |                |           |
| Root1 (S <sub>0</sub> )                    | -1407.823360           | -28.199101     | 13.8      |
| Root2 (S <sub>1</sub> ( <sup>1</sup> ππ*)) | -1407.668614           |                | 110.9     |
| <b>S<sub>0</sub>-(-50°)</b>                |                        |                |           |
| Root1 (S <sub>0</sub> )                    | -1407.827991           | -28.197605     | 11.9      |
| Root2 (S <sub>1</sub> ( <sup>1</sup> ππ*)) | -1407.679359           |                | 105.1     |
| <b>S<sub>0</sub>-(-40°)</b>                |                        |                |           |
| Root1 (S <sub>0</sub> )                    | -1407.832506           | -28.201818     | 6.4       |
| Root2 (S <sub>1</sub> ( <sup>1</sup> ππ*)) | -1407.680527           |                | 101.8     |
| <b>S<sub>0</sub>-(-30°)</b>                |                        |                |           |
| Root1 (S <sub>0</sub> )                    | -1407.842490           | -28.192355     | 6.1       |
| Root2 (S <sub>1</sub> ( <sup>1</sup> ππ*)) | -1407.690953           |                | 101.1     |
| <b>S<sub>0</sub>-(-29.6°)</b>              |                        |                |           |
| Root1 (S <sub>0</sub> )                    | -1407.853031           | -28.184416     | 4.4       |
| Root2 (S <sub>1</sub> ( <sup>1</sup> ππ*)) | -1407.701430           |                | 99.6      |
| <b>(OBF)C10C11C12S13</b>                   | <b>CASPT2<br/>A.E.</b> | <b>MM part</b> | <b>ΔE</b> |
| <b>S<sub>0</sub>-(-40°)</b>                |                        |                |           |
| Root1 (S <sub>0</sub> )                    | -1407.846606           | -28.189029     | 5.6       |
| Root2 (S <sub>1</sub> ( <sup>1</sup> ππ*)) | -1407.701585           |                | 96.6      |
| <b>S<sub>0</sub>-(-50°)</b>                |                        |                |           |
| Root1 (S <sub>0</sub> )                    | -1407.841211           | -28.191688     | 7.3       |
| Root2 (S <sub>1</sub> ( <sup>1</sup> ππ*)) | -1407.690221           |                | 102.0     |
| <b>S<sub>0</sub>-(-60°)</b>                |                        |                |           |
| Root1 (S <sub>0</sub> )                    | -1407.836238           | -28.194516     | 8.6       |
| Root2 (S <sub>1</sub> ( <sup>1</sup> ππ*)) | -1407.679199           |                | 107.2     |
| <b>S<sub>0</sub>-(-70°)</b>                |                        |                |           |
| Root1 (S <sub>0</sub> )                    | -1407.831041           | -28.194779     | 11.7      |
| Root2 (S <sub>1</sub> ( <sup>1</sup> ππ*)) | -1407.670266           |                | 112.6     |
| <b>S<sub>0</sub>-(-80°)</b>                |                        |                |           |
| Root1 (S <sub>0</sub> )                    | -1407.826353           | -28.190634     | 17.3      |
| Root2 (S <sub>1</sub> ( <sup>1</sup> ππ*)) | -1407.664704           |                | 118.7     |
| <b>S<sub>0</sub>-(-90°)</b>                |                        |                |           |
| Root1 (S <sub>0</sub> )                    | -1407.824260           | -28.187205     | 20.7      |
| Root2 (S <sub>1</sub> ( <sup>1</sup> ππ*)) | -1407.662886           |                | 122.0     |
| <b>S<sub>0</sub>-(-100°)</b>               |                        |                |           |
| Root1 (S <sub>0</sub> )                    | -1407.811710           | -28.190492     | 26.5      |



|                                            |              |            |       |
|--------------------------------------------|--------------|------------|-------|
| Root2 (S <sub>1</sub> ( <sup>1</sup> ππ*)) | -1407.652387 |            | 126.5 |
| <b>S<sub>0</sub>-(-110°)</b>               |              |            |       |
| Root1 (S <sub>0</sub> )                    | -1407.808661 | -28.188558 | 29.7  |
| Root2 (S <sub>1</sub> ( <sup>1</sup> ππ*)) | -1407.653500 |            | 127.0 |
| <b>S<sub>0</sub>-(-120°)</b>               |              |            |       |
| Root1 (S <sub>0</sub> )                    | -1407.801403 | -28.190969 | 32.7  |
| Root2 (S <sub>1</sub> ( <sup>1</sup> ππ*)) | -1407.641771 |            | 132.9 |
| <b>S<sub>0</sub>-(-130°)</b>               |              |            |       |
| Root1 (S <sub>0</sub> )                    | -1407.802364 | -28.189786 | 32.8  |
| Root2 (S <sub>1</sub> ( <sup>1</sup> ππ*)) | -1407.645232 |            | 131.5 |
| <b>S<sub>0</sub>-(-140°)</b>               |              |            |       |
| Root1 (S <sub>0</sub> )                    | -1407.800257 | -28.192894 | 32.2  |
| Root2 (S <sub>1</sub> ( <sup>1</sup> ππ*)) | -1407.646038 |            | 129.0 |
| <b>S<sub>0</sub>-(-150°)</b>               |              |            |       |
| Root1 (S <sub>0</sub> )                    | -1407.796611 | -28.198845 | 30.8  |
| Root2 (S <sub>1</sub> ( <sup>1</sup> ππ*)) | -1407.629890 |            | 135.4 |
| <b>S<sub>0</sub>-(-160°)</b>               |              |            |       |
| Root1 (S <sub>0</sub> )                    | -1407.800046 | -28.198401 | 28.9  |
| Root2 (S <sub>1</sub> ( <sup>1</sup> ππ*)) | -1407.633559 |            | 133.4 |
| <b>S<sub>0</sub>-(-170°)</b>               |              |            |       |
| Root1 (S <sub>0</sub> )                    | -1407.800262 | -28.201338 | 26.9  |
| Root2 (S <sub>1</sub> ( <sup>1</sup> ππ*)) | -1407.630508 |            | 133.4 |
| <b>S<sub>0</sub>-(-173°)</b>               |              |            |       |
| Root1 (S <sub>0</sub> )                    | -1407.802607 | -28.204903 | 23.2  |
| Root2 (S <sub>1</sub> ( <sup>1</sup> ππ*)) | -1407.633755 |            | 129.2 |

**Table S4-4-(II).** Absolute energies (A.E., hartree), relative energies ( $\Delta E$ , kcal/mol), and MM energies (hartree) of optimized structures for proton transfer (reaction coordinate: O26-H27 distance and O22-H4 distance) in PYP. The corresponding energy profiles are plotted in Figure 4-(II) of the main article.

| O26-H27                                    | CASPT2<br>A.E. | MM part    | $\Delta E$ |
|--------------------------------------------|----------------|------------|------------|
| <b>S<sub>0</sub>- (0.95Å)</b>              |                |            |            |
| Root1 (S <sub>0</sub> )                    | -1429.094380   | -28.129141 | 27.9       |
| Root2 (S <sub>1</sub> ( <sup>1</sup> ππ*)) | -1428.941783   |            | 123.6      |
| <b>S<sub>0</sub>- (1.0Å)</b>               |                |            |            |
| Root1 (S <sub>0</sub> )                    | -1429.145977   | -28.12203  | 0.0        |
| Root2 (S <sub>1</sub> ( <sup>1</sup> ππ*)) | -1428.999122   |            | 92.2       |
| <b>S<sub>0</sub>- (1.1Å)</b>               |                |            |            |
| Root1 (S <sub>0</sub> )                    | -1429.138770   | -28.12098  | 5.2        |
| Root2 (S <sub>1</sub> ( <sup>1</sup> ππ*)) | -1428.993132   |            | 96.6       |
| <b>S<sub>0</sub>- (1.2Å)</b>               |                |            |            |
| Root1 (S <sub>0</sub> )                    | -1429.131481   | -28.127662 | 5.6        |
| Root2 (S <sub>1</sub> ( <sup>1</sup> ππ*)) | -1428.993684   |            | 92.0       |

|                                            |                        |                |           |
|--------------------------------------------|------------------------|----------------|-----------|
| <b>S<sub>0</sub>-(1.3Å)</b>                |                        |                |           |
| Root1 (S <sub>0</sub> )                    | -1429.134638           | -28.12606      | 4.6       |
| Root2 (S <sub>1</sub> ( <sup>1</sup> ππ*)) | -1428.998196           |                | 90.2      |
| <b>S<sub>0</sub>-(1.4Å)</b>                |                        |                |           |
| Root1 (S <sub>0</sub> )                    | -1429.140037           | -28.1276       | 0.2       |
| Root2 (S <sub>1</sub> ( <sup>1</sup> ππ*)) | -1429.003999           |                | 85.6      |
| <b>S<sub>0</sub>-(1.5Å)</b>                |                        |                |           |
| Root1 (S <sub>0</sub> )                    | -1429.141797           | -28.128503     | -1.4      |
| Root2 (S <sub>1</sub> ( <sup>1</sup> ππ*)) | -1429.006104           |                | 83.7      |
| <b>S<sub>0</sub>-(1.6Å)</b>                |                        |                |           |
| Root1 (S <sub>0</sub> )                    | -1429.141862           | -28.12806      | -1.2      |
| Root2 (S <sub>1</sub> ( <sup>1</sup> ππ*)) | -1429.006471           |                | 83.8      |
| <b>O22-H4</b>                              | <b>CASPT2<br/>A.E.</b> | <b>MM part</b> | <b>ΔE</b> |
| <b>S<sub>0</sub>- (1.6Å)</b>               |                        |                |           |
| Root1 (S <sub>0</sub> )                    | -1429.140150           | -28.127634     | 0.1       |
| Root2 (S <sub>1</sub> ( <sup>1</sup> ππ*)) | -1429.005193           |                | 84.8      |
| <b>S<sub>0</sub>-(1.5Å)</b>                |                        |                |           |
| Root1 (S <sub>0</sub> )                    | -1429.136676           | -28.125504     | 3.7       |
| Root2 (S <sub>1</sub> ( <sup>1</sup> ππ*)) | -1429.016322           |                | 79.2      |
| <b>S<sub>0</sub>-(1.4Å)</b>                |                        |                |           |
| Root1 (S <sub>0</sub> )                    | -1429.139328           | -28.125723     | 1.9       |
| Root2 (S <sub>1</sub> ( <sup>1</sup> ππ*)) | -1429.021996           |                | 75.5      |
| <b>S<sub>0</sub>-(1.3Å)</b>                |                        |                |           |
| Root1 (S <sub>0</sub> )                    | -1429.141779           | -28.126207     | 0.0       |
| Root2 (S <sub>1</sub> ( <sup>1</sup> ππ*)) | -1429.027915           |                | 71.5      |
| <b>S<sub>0</sub>-(1.2Å)</b>                |                        |                |           |
| Root1 (S <sub>0</sub> )                    | -1429.145266           | -28.125239     | -1.6      |
| Root2 (S <sub>1</sub> ( <sup>1</sup> ππ*)) | -1429.035548           |                | 67.3      |
| <b>S<sub>0</sub>-(1.1Å)</b>                |                        |                |           |
| Root1 (S <sub>0</sub> )                    | -1429.148267           | -28.128278     | -5.4      |
| Root2 (S <sub>1</sub> ( <sup>1</sup> ππ*)) | -1429.043766           |                | 60.2      |
| <b>S<sub>0</sub>-(1.0Å)</b>                |                        |                |           |
| Root1 (S <sub>0</sub> )                    | -1429.152419           | -28.127685     | -7.6      |
| Root2 (S <sub>1</sub> ( <sup>1</sup> ππ*)) | -1429.049230           |                | 57.2      |

**Table S4-4-(III).** Absolute energies (A.E., hartree), relative energies (ΔE, kcal/mol), and MM energies (hartree) of optimized structures for ground state relaxation of OBF isomerization along the reaction coordinate of C9-C10-C11-C12 dihedral angle(°) in PYP. The corresponding energy profiles are plotted in Figure 4-(III) of the main article.

|                                            |                        |                |           |
|--------------------------------------------|------------------------|----------------|-----------|
| <b>(OBF) C9C10C11C12</b>                   | <b>CASPT2<br/>A.E.</b> | <b>MM part</b> | <b>ΔE</b> |
| <b>S<sub>0</sub>- (-1.9°)</b>              |                        |                |           |
| Root1 (S <sub>0</sub> )                    | -1429.152419           | -28.127685     | -7.6      |
| Root2 (S <sub>1</sub> ( <sup>1</sup> ππ*)) | -1429.049230           |                | 57.2      |
| <b>S<sub>0</sub>-(10°)</b>                 |                        |                |           |

|                               |              |            |      |
|-------------------------------|--------------|------------|------|
| Root1 (S <sub>0</sub> )       | -1429.148840 | -28.129242 | -6.3 |
| Root2 (S <sub>1</sub> (1ππ*)) | -1429.046106 |            | 58.1 |
| <b>S<sub>0</sub>-(20°)</b>    |              |            |      |
| Root1 (S <sub>0</sub> )       | -1429.147491 | -28.120952 | -0.3 |
| Root2 (S <sub>1</sub> (1ππ*)) | -1429.044620 |            | 64.3 |
| <b>S<sub>0</sub>-(30)</b>     |              |            |      |
| Root1 (S <sub>0</sub> )       | -1429.145830 | -28.120612 | 1.0  |
| Root2 (S <sub>1</sub> (1ππ*)) | -1429.043662 |            | 65.1 |
| <b>S<sub>0</sub>-(40°)</b>    |              |            |      |
| Root1 (S <sub>0</sub> )       | -1429.141363 | -28.123477 | 2.0  |
| Root2 (S <sub>1</sub> (1ππ*)) | -1429.040262 |            | 65.4 |
| <b>S<sub>0</sub>-(50°)</b>    |              |            |      |
| Root1 (S <sub>0</sub> )       | -1429.139136 | -28.119786 | 5.7  |
| Root2 (S <sub>1</sub> (1ππ*)) | -1429.040293 |            | 67.7 |
| <b>S<sub>0</sub>-(60°)</b>    |              |            |      |
| Root1 (S <sub>0</sub> )       | -1429.134390 | -28.12056  | 8.2  |
| Root2 (S <sub>1</sub> (1ππ*)) | -1429.038494 |            | 68.4 |
| <b>S<sub>0</sub>-(70°)</b>    |              |            |      |
| Root1 (S <sub>0</sub> )       | -1429.126561 | -28.120008 | 13.5 |
| Root2 (S <sub>1</sub> (1ππ*)) | -1429.033136 |            | 72.1 |
| <b>S<sub>0</sub>-(80°)</b>    |              |            |      |
| Root1 (S <sub>0</sub> )       | -1429.118857 | -28.120711 | 17.8 |
| Root2 (S <sub>1</sub> (1ππ*)) | -1429.029995 |            | 73.6 |
| <b>S<sub>0</sub>-(90°)</b>    |              |            |      |
| Root1 (S <sub>0</sub> )       | -1429.110130 | -28.118323 | 24.8 |
| Root2 (S <sub>1</sub> (1ππ*)) | -1429.028956 |            | 75.8 |
| <b>S<sub>0</sub>-(100°)</b>   |              |            |      |
| Root1 (S <sub>0</sub> )       | -1429.091646 | -28.131821 | 27.9 |
| Root2 (S <sub>1</sub> (1ππ*)) | -1429.046048 |            | 56.6 |
| <b>S<sub>0</sub>-(110°)</b>   |              |            |      |
| Root1 (S <sub>0</sub> )       | -1429.088301 | -28.133401 | 29.1 |
| Root2 (S <sub>1</sub> (1ππ*)) | -1429.046868 |            | 55.1 |
| <b>S<sub>0</sub>-(120°)</b>   |              |            |      |
| Root1 (S <sub>0</sub> )       | -1429.116483 | -28.108818 | 26.8 |
| Root2 (S <sub>1</sub> (1ππ*)) | -1429.026556 |            | 83.2 |
| <b>S<sub>0</sub>-(130°)</b>   |              |            |      |
| Root1 (S <sub>0</sub> )       | -1429.124051 | -28.109189 | 21.8 |
| Root2 (S <sub>1</sub> (1ππ*)) | -1429.029681 |            | 81.0 |
| <b>S<sub>0</sub>-(140°)</b>   |              |            |      |
| Root1 (S <sub>0</sub> )       | -1429.113174 | -28.128019 | 16.8 |
| Root2 (S <sub>1</sub> (1ππ*)) | -1429.018126 |            | 76.5 |
| <b>S<sub>0</sub>-(150°)</b>   |              |            |      |
| Root1 (S <sub>0</sub> )       | -1429.117815 | -28.129631 | 12.9 |
| Root2 (S <sub>1</sub> (1ππ*)) | -1429.019958 |            | 74.3 |
| <b>S<sub>0</sub>-(160°)</b>   |              |            |      |
| Root1 (S <sub>0</sub> )       | -1429.126318 | -28.127978 | 8.6  |
| Root2 (S <sub>1</sub> (1ππ*)) | -1429.023337 |            | 73.2 |
| <b>S<sub>0</sub>-(170°)</b>   |              |            |      |
| Root1 (S <sub>0</sub> )       | -1429.137535 | -28.126533 | 2.5  |

|                                            |              |  |      |
|--------------------------------------------|--------------|--|------|
| Root2 (S <sub>1</sub> ( <sup>1</sup> ππ*)) | -1429.030875 |  | 69.4 |
|--------------------------------------------|--------------|--|------|

**Table S4-5-(I).** Absolute energies (A.E., hartree), relative energies ( $\Delta E$ , kcal/mol), and MM energies (hartree) of optimized structures for proton transfer (reaction coordinate: O19-H18 distance) in PYP. The corresponding energy profiles are plotted in Figure 5 of the main article.

| O19-H18                                    | CASPT2<br>A.E. | MM part    | $\Delta E$ |
|--------------------------------------------|----------------|------------|------------|
| <b>S<sub>0</sub>-(1.0Å)</b>                |                |            |            |
| Root1 (S <sub>0</sub> )                    | -1622.390069   | -28.150408 | 0.0        |
| Root2 (S <sub>1</sub> ( <sup>1</sup> ππ*)) | -1622.288786   |            | 63.6       |
| <b>S<sub>0</sub>-(1.1Å)</b>                |                |            |            |
| Root1 (S <sub>0</sub> )                    | -1622.382590   | -28.144181 | 8.6        |
| Root2 (S <sub>1</sub> ( <sup>1</sup> ππ*)) | -1622.277228   |            | 74.7       |
| <b>S<sub>0</sub>-(1.2Å)</b>                |                |            |            |
| Root1 (S <sub>0</sub> )                    | -1622.368338   | -28.150368 | 13.7       |
| Root2 (S <sub>1</sub> ( <sup>1</sup> ππ*)) | -1622.249882   |            | 88.0       |
| <b>S<sub>0</sub>-(1.3Å)</b>                |                |            |            |
| Root1 (S <sub>0</sub> )                    | -1622.374107   | -28.150524 | 9.9        |
| Root2 (S <sub>1</sub> ( <sup>1</sup> ππ*)) | -1622.249083   |            | 88.4       |
| <b>S<sub>0</sub>-(1.4Å)</b>                |                |            |            |
| Root1 (S <sub>0</sub> )                    | -1622.376705   | -28.150866 | 8.1        |
| Root2 (S <sub>1</sub> ( <sup>1</sup> ππ*)) | -1622.226122   |            | 102.6      |
| <b>S<sub>0</sub>-(1.5Å)</b>                |                |            |            |
| Root1 (S <sub>0</sub> )                    | -1622.377729   | -28.148989 | 8.6        |
| Root2 (S <sub>1</sub> ( <sup>1</sup> ππ*)) | -1622.225296   |            | 104.3      |
| <b>S<sub>0</sub>-(1.6Å)</b>                |                |            |            |
| Root1 (S <sub>0</sub> )                    | -1622.381129   | -28.147348 | 7.5        |
| Root2 (S <sub>1</sub> ( <sup>1</sup> ππ*)) | -1622.228480   |            | 103.3      |
| <b>S<sub>0</sub>-(1.7Å)</b>                |                |            |            |
| Root1 (S <sub>0</sub> )                    | -1622.381678   | -28.148069 | 6.7        |
| Root2 (S <sub>1</sub> ( <sup>1</sup> ππ*)) | -1622.228747   |            | 102.7      |
| <b>S<sub>0</sub>-(1.8Å)</b>                |                |            |            |
| Root1 (S <sub>0</sub> )                    | -1622.382690   | -28.147659 | 6.4        |
| Root2 (S <sub>1</sub> ( <sup>1</sup> ππ*)) | -1622.229627   |            | 102.4      |
| <b>S<sub>0</sub>-(1.9Å)</b>                |                |            |            |
| Root1 (S <sub>0</sub> )                    | -1622.381934   | -28.149699 | 5.5        |
| Root2 (S <sub>1</sub> ( <sup>1</sup> ππ*)) | -1622.228996   |            | 101.5      |

**Table S4-5-(II).** Absolute energies (A.E., hartree), relative energies ( $\Delta E$ , kcal/mol), and MM energies (hartree) of optimized structures for ground state relaxation of isomerization along the reaction coordinate of C11-C12-S13-C14 and C12-S13-C14-C15 dihedral angle(°) in PYP. The corresponding energy profiles are plotted in Figure 5 of the main article.

| (BP) C11C12S13C14<br>C12S13C14C15          | CASPT2<br>A.E. | MM part    | $\Delta E$ |
|--------------------------------------------|----------------|------------|------------|
| <b>S<sub>0</sub>-(-178°)</b>               |                |            |            |
| Root1 (S <sub>0</sub> )                    | -1407.828497   | -28.185387 | 19.2       |
| Root2 (S <sub>1</sub> ( <sup>1</sup> ππ*)) | -1407.739447   |            | 75.1       |
| <b>S<sub>0</sub>-(-170°)</b>               |                |            |            |
| Root1 (S <sub>0</sub> )                    | -1407.834572   | -28.177697 | 20.2       |
| Root2 (S <sub>1</sub> ( <sup>1</sup> ππ*)) | -1407.746022   |            | 75.8       |
| <b>S<sub>0</sub>-(-160°)</b>               |                |            |            |
| Root1 (S <sub>0</sub> )                    | -1407.834458   | -28.17572  | 21.5       |
| Root2 (S <sub>1</sub> ( <sup>1</sup> ππ*)) | -1407.747936   |            | 75.8       |
| <b>S<sub>0</sub>-(-150°)</b>               |                |            |            |
| Root1 (S <sub>0</sub> )                    | -1407.828697   | -28.172857 | 26.9       |
| Root2 (S <sub>1</sub> ( <sup>1</sup> ππ*)) | -1407.746235   |            | 78.7       |
| <b>S<sub>0</sub>-(-140°)</b>               |                |            |            |
| Root1 (S <sub>0</sub> )                    | -1407.824083   | -28.163773 | 35.5       |
| Root2 (S <sub>1</sub> ( <sup>1</sup> ππ*)) | -1407.748059   |            | 83.2       |
| <b>S<sub>0</sub>-(-130°)</b>               |                |            |            |
| Root1 (S <sub>0</sub> )                    | -1407.813018   | -28.177383 | 33.9       |
| Root2 (S <sub>1</sub> ( <sup>1</sup> ππ*)) | -1407.751630   |            | 72.5       |
| <b>S<sub>0</sub>-(-120°)</b>               |                |            |            |
| Root1 (S <sub>0</sub> )                    | -1407.824884   | -28.174243 | 28.5       |
| Root2 (S <sub>1</sub> ( <sup>1</sup> ππ*)) | -1407.748978   |            | 76.1       |
| <b>S<sub>0</sub>-(-110°)</b>               |                |            |            |
| Root1 (S <sub>0</sub> )                    | -1407.826823   | -28.173908 | 27.5       |
| Root2 (S <sub>1</sub> ( <sup>1</sup> ππ*)) | -1407.751180   |            | 74.9       |
| <b>S<sub>0</sub>-(-100°)</b>               |                |            |            |
| Root1 (S <sub>0</sub> )                    | -1407.834927   | -28.171685 | 23.8       |
| Root2 (S <sub>1</sub> ( <sup>1</sup> ππ*)) | -1407.755624   |            | 73.5       |
| <b>S<sub>0</sub>-(-90°)</b>                |                |            |            |
| Root1 (S <sub>0</sub> )                    | -1407.842914   | -28.163586 | 23.8       |
| Root2 (S <sub>1</sub> ( <sup>1</sup> ππ*)) | -1407.758626   |            | 76.7       |
| <b>S<sub>0</sub>-(-80°)</b>                |                |            |            |
| Root1 (S <sub>0</sub> )                    | -1407.828167   | -28.178211 | 23.9       |
| Root2 (S <sub>1</sub> ( <sup>1</sup> ππ*)) | -1407.737781   |            | 80.6       |
| <b>S<sub>0</sub>-(-70°)</b>                |                |            |            |
| Root1 (S <sub>0</sub> )                    | -1407.833284   | -28.177476 | 21.2       |
| Root2 (S <sub>1</sub> ( <sup>1</sup> ππ*)) | -1407.736295   |            | 82.0       |
| <b>S<sub>0</sub>-(-60°)</b>                |                |            |            |
| Root1 (S <sub>0</sub> )                    | -1407.833816   | -28.180282 | 19.1       |
| Root2 (S <sub>1</sub> ( <sup>1</sup> ππ*)) | -1407.731823   |            | 83.1       |
| <b>S<sub>0</sub>-(-50°)</b>                |                |            |            |
| Root1 (S <sub>0</sub> )                    | -1407.838324   | -28.180865 | 15.9       |
| Root2 (S <sub>1</sub> ( <sup>1</sup> ππ*)) | -1407.741040   |            | 76.9       |
| <b>S<sub>0</sub>-(-40°)</b>                |                |            |            |
| Root1 (S <sub>0</sub> )                    | -1407.848813   | -28.181721 | 8.8        |
| Root2 (S <sub>1</sub> ( <sup>1</sup> ππ*)) | -1407.750598   |            | 70.4       |

|                                            |                        |                |           |
|--------------------------------------------|------------------------|----------------|-----------|
| <b>S<sub>0</sub>-(-30°)</b>                |                        |                |           |
| Root1 (S <sub>0</sub> )                    | -1407.846854           | -28.18904      | 5.4       |
| Root2 (S <sub>1</sub> ( <sup>1</sup> ππ*)) | -1407.751567           |                | 65.2      |
| <b>S<sub>0</sub>-(-20°)</b>                |                        |                |           |
| Root1 (S <sub>0</sub> )                    | -1407.849627           | -28.194665     | 0.1       |
| Root2 (S <sub>1</sub> ( <sup>1</sup> ππ*)) | -1407.753705           |                | 60.3      |
| <b>S<sub>0</sub>-(-9°)</b>                 |                        |                |           |
| Root1 (S <sub>0</sub> )                    | -1407.860629           | -28.190691     | -4.3      |
| Root2 (S <sub>1</sub> ( <sup>1</sup> ππ*)) | -1407.759688           |                | 59.1      |
| <b>(OBF)C11C12S13C14</b>                   | <b>CASPT2<br/>A.E.</b> | <b>MM part</b> | <b>ΔE</b> |
| <b>S<sub>0</sub>-(-20°)</b>                |                        |                |           |
| Root1 (S <sub>0</sub> )                    | -1407.858891           | -28.191437     | -3.7      |
| Root2 (S <sub>1</sub> ( <sup>1</sup> ππ*)) | -1407.759053           |                | 59.0      |
| <b>S<sub>0</sub>-(-30°)</b>                |                        |                |           |
| Root1 (S <sub>0</sub> )                    | -1407.857331           | -28.19054      | -2.1      |
| Root2 (S <sub>1</sub> ( <sup>1</sup> ππ*)) | -1407.758284           |                | 60.0      |
| <b>S<sub>0</sub>-(-40°)</b>                |                        |                |           |
| Root1 (S <sub>0</sub> )                    | -1407.855971           | -28.188858     | -0.2      |
| Root2 (S <sub>1</sub> ( <sup>1</sup> ππ*)) | -1407.757891           |                | 61.3      |
| <b>S<sub>0</sub>-(-50°)</b>                |                        |                |           |
| Root1 (S <sub>0</sub> )                    | -1407.851324           | -28.184759     | 5.3       |
| Root2 (S <sub>1</sub> ( <sup>1</sup> ππ*)) | -1407.749466           |                | 69.2      |
| <b>S<sub>0</sub>-(-60°)</b>                |                        |                |           |
| Root1 (S <sub>0</sub> )                    | -1407.851660           | -28.174417     | 11.6      |
| Root2 (S <sub>1</sub> ( <sup>1</sup> ππ*)) | -1407.751582           |                | 74.4      |
| <b>S<sub>0</sub>-(-70°)</b>                |                        |                |           |
| Root1 (S <sub>0</sub> )                    | -1407.852442           | -28.175967     | 10.1      |
| Root2 (S <sub>1</sub> ( <sup>1</sup> ππ*)) | -1407.753745           |                | 72.0      |
| <b>S<sub>0</sub>-(-80°)</b>                |                        |                |           |
| Root1 (S <sub>0</sub> )                    | -1407.854706           | -28.17735      | 7.8       |
| Root2 (S <sub>1</sub> ( <sup>1</sup> ππ*)) | -1407.759028           |                | 67.8      |
| <b>S<sub>0</sub>-(-90°)</b>                |                        |                |           |
| Root1 (S <sub>0</sub> )                    | -1407.855267           | -28.178708     | 6.6       |
| Root2 (S <sub>1</sub> ( <sup>1</sup> ππ*)) | -1407.760880           |                | 65.8      |
| <b>S<sub>0</sub>-(-100°)</b>               |                        |                |           |
| Root1 (S <sub>0</sub> )                    | -1407.857762           | -28.182797     | 2.5       |
| Root2 (S <sub>1</sub> ( <sup>1</sup> ππ*)) | -1407.765042           |                | 60.7      |
| <b>S<sub>0</sub>-(-110°)</b>               |                        |                |           |
| Root1 (S <sub>0</sub> )                    | -1407.860312           | -28.183763     | 0.3       |
| Root2 (S <sub>1</sub> ( <sup>1</sup> ππ*)) | -1407.767124           |                | 58.7      |
| <b>S<sub>0</sub>-(-120°)</b>               |                        |                |           |
| Root1 (S <sub>0</sub> )                    | -1407.862059           | -28.189662     | -4.5      |
| Root2 (S <sub>1</sub> ( <sup>1</sup> ππ*)) | -1407.770036           |                | 53.2      |
| <b>S<sub>0</sub>-(-130°)</b>               |                        |                |           |
| Root1 (S <sub>0</sub> )                    | -1407.864438           | -28.191354     | -7.1      |
| Root2 (S <sub>1</sub> ( <sup>1</sup> ππ*)) | -1407.771102           |                | 51.5      |
| <b>S<sub>0</sub>-(-140°)</b>               |                        |                |           |
| Root1 (S <sub>0</sub> )                    | -1407.866411           | -28.193475     | -9.7      |

|                               |              |            |       |
|-------------------------------|--------------|------------|-------|
| Root2 (S <sub>1</sub> (1ππ*)) | -1407.771965 |            | 49.6  |
| <b>S<sub>0</sub>(-150°)</b>   |              |            |       |
| Root1 (S <sub>0</sub> )       | -1407.867528 | -28.195235 | -11.5 |
| Root2 (S <sub>1</sub> (1ππ*)) | -1407.772239 |            | 48.3  |
| <b>S<sub>0</sub>(-160°)</b>   |              |            |       |
| Root1 (S <sub>0</sub> )       | -1407.867770 | -28.195373 | -11.7 |
| Root2 (S <sub>1</sub> (1ππ*)) | -1407.771272 |            | 48.9  |
| <b>S<sub>0</sub>(-173°)</b>   |              |            |       |
| Root1 (S <sub>0</sub> )       | -1407.865855 | -28.195814 | -10.8 |
| Root2 (S <sub>1</sub> (1ππ*)) | -1407.768479 |            | 50.3  |

## 5. Cartesian Coordinates

S<sub>0</sub> minimum (QM1)

|   |              |              |               |
|---|--------------|--------------|---------------|
| C | 2.946818609  | -0.692207356 | -3.715090544  |
| H | 2.513265748  | -1.190780030 | -4.573908123  |
| H | 3.096297736  | -1.432443400 | -2.940652430  |
| C | 1.982450076  | 0.399143176  | -3.209287175  |
| H | 2.368920995  | 0.851282382  | -2.305669063  |
| H | 1.827671409  | 1.182959018  | -3.936191869  |
| C | 0.670908453  | -0.271372789 | -2.864859748  |
| O | 0.614770230  | -1.145170836 | -2.041885529  |
| O | -0.414737139 | 0.062608634  | -3.519048338  |
| H | -0.292487708 | 0.739224331  | -4.239327600  |
| C | -6.118193680 | 0.941509336  | -14.293665358 |
| H | -6.418369051 | 0.109141998  | -14.913287995 |
| H | -5.371587924 | 1.516079308  | -14.826995538 |
| S | -5.394531039 | 0.178378820  | -12.818638441 |
| O | -4.525369970 | 2.625345844  | -12.595149320 |
| C | -4.473507610 | 1.518599923  | -12.113989138 |
| C | -3.729889144 | 1.171747546  | -10.919560521 |
| H | -3.915252351 | 0.209339402  | -10.485084991 |
| C | -2.885002446 | 2.078409554  | -10.369429017 |
| H | -2.717621005 | 2.980490428  | -10.931428167 |
| C | -2.212932296 | 2.000620451  | -9.096880502  |
| C | -1.380356542 | 3.053348832  | -8.675335366  |
| H | -1.238905764 | 3.908107871  | -9.313532812  |
| C | -0.747600493 | 3.030838367  | -7.449204480  |
| H | -0.087217993 | 3.828735671  | -7.160329954  |
| C | -0.910128680 | 1.942196283  | -6.568158175  |
| O | -0.232399874 | 1.838898433  | -5.482051029  |
| C | -1.812775964 | 0.923624695  | -6.961962464  |
| H | -1.983330796 | 0.105483626  | -6.286190629  |
| C | -2.423188472 | 0.942806815  | -8.193539854  |
| H | -3.078396040 | 0.131266319  | -8.455849365  |
| H | 3.931488705  | -0.281476728 | -3.926147169  |
| H | -6.911157744 | 1.644911754  | -14.052567283 |

## S<sub>1</sub> minimum

|   |              |              |               |
|---|--------------|--------------|---------------|
| C | 2.909529547  | -0.729029922 | -3.732552250  |
| H | 2.482377317  | -1.211379948 | -4.603207292  |
| H | 3.056989138  | -1.486519584 | -2.973585564  |
| C | 1.943321716  | 0.353214317  | -3.209292822  |
| H | 2.338442910  | 0.806593246  | -2.310232825  |
| H | 1.776066075  | 1.137073096  | -3.934201257  |
| C | 0.640832003  | -0.327160852 | -2.853493323  |
| O | 0.586161421  | -1.191857557 | -2.026202901  |
| O | -0.456214564 | -0.002438404 | -3.507797284  |
| H | -0.349210265 | 0.698448774  | -4.190507517  |
| C | -6.194459605 | 0.836082659  | -14.162677532 |
| H | -6.465791588 | -0.009586077 | -14.777565567 |
| H | -5.448672010 | 1.421044800  | -14.685101368 |
| S | -5.478284451 | 0.116946041  | -12.657355746 |
| O | -4.669777885 | 2.605558774  | -12.499912232 |
| C | -4.493879267 | 1.479110848  | -12.032736088 |
| C | -3.595774483 | 1.154435687  | -11.014694049 |
| H | -3.572994636 | 0.146374496  | -10.655257493 |
| C | -2.682216666 | 2.153886788  | -10.515970845 |
| H | -2.552333729 | 3.046584433  | -11.087380354 |
| C | -2.118816915 | 2.089221551  | -9.200649727  |
| C | -1.327166296 | 3.166319348  | -8.692619512  |
| H | -1.163762701 | 4.031324571  | -9.306265409  |
| C | -0.781437859 | 3.120123275  | -7.431112280  |
| H | -0.158568390 | 3.918168811  | -7.065116996  |
| C | -0.979700597 | 1.974295365  | -6.575848126  |
| O | -0.351158806 | 1.879048577  | -5.484769095  |
| C | -1.842575242 | 0.948800636  | -7.044182797  |
| H | -2.026627423 | 0.109730751  | -6.397996679  |
| C | -2.381877541 | 0.985831312  | -8.313446550  |
| H | -3.010417899 | 0.182015682  | -8.636667167  |
| H | 3.896487700  | -0.313203654 | -3.923990232  |
| H | -7.009197831 | 1.525102834  | -13.953485987 |

## CI(S<sub>0</sub>/S<sub>1</sub>)

|   |              |              |               |
|---|--------------|--------------|---------------|
| C | 2.837643517  | -0.656490172 | -4.650233480  |
| H | 2.230000162  | -0.993222706 | -5.481745270  |
| H | 3.130307862  | -1.524085750 | -4.075485539  |
| C | 2.015560363  | 0.305981584  | -3.769887086  |
| H | 2.597013689  | 0.635308673  | -2.919203717  |
| H | 1.687200488  | 1.178329813  | -4.317991931  |
| C | 0.826365928  | -0.469189820 | -3.251604152  |
| O | 0.967862172  | -1.451253942 | -2.577409725  |
| O | -0.385531634 | -0.116240438 | -3.617393988  |
| H | -0.460496768 | 0.748379865  | -4.096845843  |
| C | -7.507066731 | 1.472079548  | -12.811257212 |
| H | -7.932208739 | 0.702069717  | -13.439737324 |
| H | -6.831061370 | 2.063823540  | -13.415263987 |
| S | -6.609637998 | 0.560671270  | -11.522998271 |



|   |              |              |               |
|---|--------------|--------------|---------------|
| O | -5.465135984 | 2.917441604  | -11.215960318 |
| C | -5.319491906 | 1.729659511  | -11.060051842 |
| C | -4.095889048 | 1.044035523  | -10.655836043 |
| H | -4.190881439 | -0.041388319 | -10.670878276 |
| C | -2.887174528 | 1.635455213  | -10.122046432 |
| H | -2.184506873 | 2.005218139  | -10.838478131 |
| C | -2.594660379 | 1.975091824  | -8.765798375  |
| C | -1.501899390 | 2.834968944  | -8.489626537  |
| H | -1.082677844 | 3.416134063  | -9.286549111  |
| C | -0.938816416 | 2.933459170  | -7.238226961  |
| H | -0.117128684 | 3.600099782  | -7.070727545  |
| C | -1.390517761 | 2.141832924  | -6.143288535  |
| O | -0.805316368 | 2.169542428  | -5.018319549  |
| C | -2.494195771 | 1.299001175  | -6.415297706  |
| H | -2.852806382 | 0.679753820  | -5.615918744  |
| C | -3.081087229 | 1.230238423  | -7.665673006  |
| H | -3.877771732 | 0.530875442  | -7.807104199  |
| H | 3.769978824  | -0.187860198 | -4.969159876  |
| H | -8.225205820 | 2.182586161  | -12.397689634 |

It

|   |              |              |               |
|---|--------------|--------------|---------------|
| C | 2.883645218  | -0.740823939 | -4.579524440  |
| H | 2.273411265  | -1.085626468 | -5.406344815  |
| H | 3.181359608  | -1.604430086 | -4.002082024  |
| C | 2.068302015  | 0.222706722  | -3.691066383  |
| H | 2.650320084  | 0.529457041  | -2.832850843  |
| H | 1.761666178  | 1.110956092  | -4.226389703  |
| C | 0.870033883  | -0.552136149 | -3.195911898  |
| O | 0.982825606  | -1.529038515 | -2.518001307  |
| O | -0.342663465 | -0.194390584 | -3.592117847  |
| H | -0.394251729 | 0.654805425  | -4.068799470  |
| C | -7.458929329 | 1.285663199  | -12.700938943 |
| H | -7.857252739 | 0.492859369  | -13.319845391 |
| H | -6.760498124 | 1.861641217  | -13.294634117 |
| S | -6.597546880 | 0.467685971  | -11.322403845 |
| O | -5.633374608 | 2.902821178  | -10.951411011 |
| C | -5.297754680 | 1.698613455  | -10.928390055 |
| C | -4.086367927 | 1.121026648  | -10.747605009 |
| H | -4.034464555 | 0.059832842  | -10.838523957 |
| C | -2.908861694 | 1.814329120  | -10.188009646 |
| H | -2.229308628 | 2.279283111  | -10.882995167 |
| C | -2.612844460 | 2.074131231  | -8.885995431  |
| C | -1.485666391 | 2.941161488  | -8.559635470  |
| H | -1.077799158 | 3.553542202  | -9.342358155  |
| C | -0.969174754 | 3.018081730  | -7.314633277  |
| H | -0.160042606 | 3.682155483  | -7.076029795  |
| C | -1.468401354 | 2.150641196  | -6.247192276  |
| O | -0.909530694 | 2.111413001  | -5.159139737  |
| C | -2.627233588 | 1.309926929  | -6.552403774  |
| H | -2.994146471 | 0.681334176  | -5.761853658  |
| C | -3.188618544 | 1.312116294  | -7.783924171  |

|   |              |              |               |
|---|--------------|--------------|---------------|
| H | -4.029223986 | 0.682229565  | -8.005094967  |
| H | 3.816094626  | -0.269423268 | -4.898824939  |
| H | -8.206390923 | 2.006140098  | -12.361363733 |

I<sub>CT</sub>

|   |              |              |               |
|---|--------------|--------------|---------------|
| C | 2.880650662  | -0.678935876 | -4.760801584  |
| H | 2.219076716  | -1.106666137 | -5.503713640  |
| H | 3.271222996  | -1.485974923 | -4.154689784  |
| C | 2.085074373  | 0.301659200  | -3.874737419  |
| H | 2.705512334  | 0.665614548  | -3.065761674  |
| H | 1.718244698  | 1.152116748  | -4.430882578  |
| C | 0.929096346  | -0.480039336 | -3.287144394  |
| O | 1.117424088  | -1.462310000 | -2.621809072  |
| O | -0.301620994 | -0.127686355 | -3.577541242  |
| H | -0.418453602 | 0.733772938  | -4.061081430  |
| C | -8.113389874 | 1.152820860  | -11.876294836 |
| H | -8.561622266 | 0.331034603  | -12.413361113 |
| H | -7.590485598 | 1.778939153  | -12.588666952 |
| S | -6.915289401 | 0.353411086  | -10.746473787 |
| O | -6.045896479 | 2.801822715  | -10.526117077 |
| C | -5.700215621 | 1.655704101  | -10.558288726 |
| C | -4.296648027 | 1.216400591  | -10.728777253 |
| H | -4.201477250 | 0.791988939  | -11.714244464 |
| C | -3.143140268 | 1.462128725  | -10.077684074 |
| H | -2.280042062 | 1.233465864  | -10.677194166 |
| C | -2.783869588 | 1.782595747  | -8.686476875  |
| C | -1.661746189 | 2.597414625  | -8.463406227  |
| H | -1.216486477 | 3.124155023  | -9.290840633  |
| C | -1.088064969 | 2.728295325  | -7.212243618  |
| H | -0.233907478 | 3.367731009  | -7.083077272  |
| C | -1.569432292 | 2.008981679  | -6.086836647  |
| O | -0.990070217 | 2.070802975  | -4.950409290  |
| C | -2.695991885 | 1.182151462  | -6.329326353  |
| H | -3.077141588 | 0.602181002  | -5.506944426  |
| C | -3.283253984 | 1.076261713  | -7.582728441  |
| H | -4.105765035 | 0.393521263  | -7.716758455  |
| H | 3.755209333  | -0.197913791 | -5.191717291  |
| H | -8.803981689 | 1.810392047  | -11.356734220 |

I<sub>CP</sub>(QM2)

|   |              |              |              |
|---|--------------|--------------|--------------|
| C | 2.961604758  | -0.534074403 | -4.485769752 |
| H | 2.436647497  | -0.975067127 | -5.323274782 |
| H | 3.346536037  | -1.337510044 | -3.871671647 |
| C | 1.967098903  | 0.311594700  | -3.663093444 |
| H | 2.441337389  | 0.695067929  | -2.769138871 |
| H | 1.572621077  | 1.145255451  | -4.225615035 |
| C | 0.850926642  | -0.627127476 | -3.257357642 |
| O | 1.072757692  | -1.627820466 | -2.631365140 |
| O | -0.368158571 | -0.390057754 | -3.683442881 |
| H | -0.501605379 | 0.468278373  | -4.167448814 |

|   |               |              |               |
|---|---------------|--------------|---------------|
| N | -8.377237544  | 2.748002055  | -11.823941849 |
| H | -7.591451822  | 2.869967277  | -11.235149344 |
| C | -8.473857319  | 1.458770788  | -12.454053044 |
| H | -9.065479389  | 1.553494595  | -13.356737301 |
| C | -7.061993580  | 0.964376254  | -12.871271892 |
| H | -7.112665742  | 0.606872942  | -13.889858402 |
| H | -6.394424151  | 1.814797791  | -12.883422436 |
| S | -6.308828038  | -0.431694935 | -11.967322107 |
| C | -9.237498508  | 0.432639066  | -11.607409292 |
| O | -10.036450901 | -0.300126053 | -12.107586041 |
| O | -5.285816616  | -0.316484734 | -9.616306179  |
| C | -5.198828661  | 0.220304556  | -10.670741220 |
| C | -4.138018378  | 1.151552248  | -11.071746288 |
| H | -4.159976159  | 1.414862703  | -12.112973965 |
| C | -3.093008058  | 1.637653701  | -10.341797233 |
| H | -2.453672177  | 2.266089653  | -10.937316270 |
| C | -2.588307167  | 1.564410697  | -8.977120071  |
| C | -1.586313777  | 2.496590415  | -8.640316638  |
| H | -1.241153466  | 3.191652476  | -9.387531212  |
| C | -1.016701427  | 2.565837989  | -7.381620925  |
| H | -0.267286807  | 3.307171102  | -7.167626990  |
| C | -1.418351489  | 1.697226116  | -6.336296888  |
| O | -0.924223173  | 1.766952363  | -5.168356862  |
| C | -2.389302040  | 0.716348194  | -6.698502733  |
| H | -2.688295849  | 0.010212034  | -5.943077286  |
| C | -2.958769675  | 0.657886592  | -7.953791656  |
| H | -3.691591777  | -0.093977451 | -8.151713261  |
| H | -9.272077754  | 3.210632418  | -11.685092460 |
| H | -9.040880849  | 0.387596962  | -10.546683551 |
| H | 3.830425799   | 0.041567834  | -4.774686513  |

pR<sub>1</sub>

|   |              |              |               |
|---|--------------|--------------|---------------|
| C | 2.975992702  | 0.247208872  | -5.098713331  |
| H | 2.350540246  | -0.057611689 | -5.927230756  |
| H | 3.247797251  | -0.639258013 | -4.539900494  |
| C | 2.204463555  | 1.220999422  | -4.186105080  |
| H | 2.736798134  | 1.375056577  | -3.260168028  |
| H | 2.059039921  | 2.192993061  | -4.639868332  |
| C | 0.875478382  | 0.590498790  | -3.864442752  |
| O | 0.764452110  | -0.458637353 | -3.305008005  |
| O | -0.220927639 | 1.207371886  | -4.288078234  |
| H | -0.018081187 | 2.034202585  | -4.752620070  |
| N | -8.278793325 | 4.400048256  | -12.712698690 |
| H | -7.361647500 | 4.616927895  | -12.397893050 |
| C | -8.518081509 | 3.094191806  | -13.251372978 |
| H | -9.090681826 | 3.166966320  | -14.172834031 |
| C | -7.187325349 | 2.385998191  | -13.609011706 |
| H | -7.333074839 | 1.795138174  | -14.501254820 |
| H | -6.427204882 | 3.122116876  | -13.828338054 |
| S | -6.545503673 | 1.197839895  | -12.390733335 |
| C | -9.375422790 | 2.192411056  | -12.338576090 |

|   |               |             |               |
|---|---------------|-------------|---------------|
| O | -10.110030880 | 1.359991377 | -12.796186085 |
| O | -4.810213796  | 3.097747152 | -11.751808852 |
| C | -5.153687793  | 1.971375809 | -11.541109945 |
| C | -4.626795045  | 0.978953203 | -10.588119770 |
| H | -5.078624535  | 0.013801316 | -10.715739119 |
| C | -3.778704856  | 1.081044661 | -9.531950298  |
| H | -3.741926609  | 0.171926916 | -8.951635423  |
| C | -2.954338668  | 2.141431564 | -8.973550611  |
| C | -2.293311034  | 3.136106333 | -9.722101094  |
| H | -2.321820146  | 3.095135679 | -10.794484768 |
| C | -1.580315881  | 4.139156728 | -9.102069614  |
| H | -1.048032520  | 4.872080125 | -9.680617936  |
| C | -1.551526739  | 4.287593995 | -7.679252488  |
| O | -1.026372073  | 5.289983818 | -7.123874774  |
| C | -2.135855624  | 3.223287925 | -6.944252225  |
| H | -2.147992796  | 3.311782268 | -5.869716545  |
| C | -2.802490838  | 2.187310920 | -7.577405500  |
| H | -3.254809553  | 1.414853628 | -6.976282106  |
| H | -9.090446342  | 4.985609468 | -12.582232685 |
| H | -9.290758558  | 2.327792033 | -11.266710268 |
| H | 3.916426659   | 0.684463212 | -5.410891612  |

#### pR<sub>1</sub>- pR<sub>2</sub> intermediate

|   |               |              |               |
|---|---------------|--------------|---------------|
| C | 4.219833790   | -1.384346316 | -6.159641700  |
| H | 3.426071615   | -1.913636967 | -6.672481712  |
| H | 4.735660151   | -2.091085546 | -5.522263261  |
| C | 3.621651558   | -0.245046393 | -5.316265036  |
| H | 4.401376263   | 0.284361654  | -4.783265185  |
| H | 3.091617258   | 0.473044726  | -5.925579829  |
| C | 2.681906398   | -0.822333174 | -4.282435506  |
| O | 3.017838678   | -1.698508868 | -3.533413813  |
| O | 1.452030499   | -0.365143281 | -4.225234874  |
| H | 1.204567759   | 0.284419967  | -4.934115029  |
| N | -9.065640417  | 2.617383483  | -9.098794166  |
| H | -8.225258950  | 2.610898469  | -8.560962805  |
| C | -9.585390638  | 1.295078432  | -9.389642947  |
| H | -10.397651786 | 1.399426915  | -10.094231500 |
| C | -8.575130944  | 0.258428428  | -9.962093507  |
| H | -8.155913817  | -0.369660765 | -9.188110607  |
| H | -9.150192200  | -0.408807639 | -10.586885411 |
| S | -7.223949706  | 0.844276075  | -11.018834808 |
| C | -10.172579949 | 0.599573238  | -8.159841423  |
| O | -11.225112862 | 0.044967882  | -8.155365907  |
| O | -4.735664617  | 1.232805769  | -10.617447197 |
| C | -5.725070442  | 0.993435578  | -10.006651977 |
| C | -5.839540159  | 0.820291793  | -8.556834217  |
| H | -6.837608721  | 0.704222765  | -8.196122503  |
| C | -4.889492639  | 0.688919165  | -7.594708908  |
| H | -5.342354956  | 0.483585358  | -6.642341999  |
| C | -3.451036695  | 0.789173943  | -7.417632125  |
| C | -3.001679939  | 0.476038521  | -6.124869780  |

|   |              |              |              |
|---|--------------|--------------|--------------|
| H | -3.715634802 | 0.128587393  | -5.399898854 |
| C | -1.679193385 | 0.583884281  | -5.744652646 |
| H | -1.370313435 | 0.304832533  | -4.752206592 |
| C | -0.707367215 | 1.024081667  | -6.648254549 |
| O | 0.545594317  | 1.049786330  | -6.336605504 |
| C | -1.161122577 | 1.384348681  | -7.948948308 |
| H | -0.427996756 | 1.746030070  | -8.646554315 |
| C | -2.479670909 | 1.248353044  | -8.335683107 |
| H | -2.767226927 | 1.491900337  | -9.338397157 |
| H | -9.826664242 | 3.259302707  | -8.888028318 |
| H | -9.558332006 | 0.614904874  | -7.248902477 |
| H | 4.978787542  | -1.004917634 | -6.843452320 |

pR<sub>2</sub>

|   |               |              |               |
|---|---------------|--------------|---------------|
| C | 3.815979054   | -1.293832638 | -5.046478192  |
| H | 3.074346088   | -1.793142535 | -5.657308025  |
| H | 4.323207343   | -2.044778419 | -4.454750049  |
| C | 3.116343155   | -0.275626752 | -4.124001748  |
| H | 3.832591399   | 0.183564313  | -3.454306333  |
| H | 2.629089344   | 0.504708774  | -4.686893335  |
| C | 2.103003464   | -1.019437972 | -3.283201362  |
| O | 2.435864087   | -1.898690091 | -2.537350832  |
| O | 0.822428891   | -0.741580244 | -3.407407042  |
| H | 0.583970299   | -0.023241591 | -4.036618920  |
| N | -9.247840272  | 2.213313330  | -8.983111733  |
| H | -8.472181733  | 2.224504915  | -8.359259224  |
| C | -9.654308725  | 0.876552093  | -9.351349776  |
| H | -10.502507834 | 0.942269356  | -10.017291297 |
| C | -8.547901917  | 0.012880299  | -10.029284200 |
| H | -8.072291164  | -0.651066153 | -9.319962262  |
| H | -9.014746055  | -0.608918064 | -10.779570543 |
| S | -7.220056232  | 0.882096934  | -10.877415204 |
| C | -10.106219375 | 0.052705185  | -8.148004998  |
| O | -11.120864415 | -0.572013147 | -8.122418802  |
| O | -6.402615656  | 0.880060718  | -8.384907651  |
| C | -6.130394655  | 1.239948503  | -9.494655685  |
| C | -4.998618729  | 2.074243712  | -9.900057211  |
| H | -5.144402691  | 2.560936575  | -10.845497455 |
| C | -3.865844310  | 2.427419736  | -9.238716515  |
| H | -3.365272478  | 3.224945049  | -9.744675689  |
| C | -3.103728692  | 2.047549096  | -8.058866678  |
| C | -2.027545344  | 2.899623328  | -7.751045542  |
| H | -1.880987207  | 3.787307971  | -8.341425209  |
| C | -1.133743862  | 2.635146905  | -6.737991898  |
| H | -0.316472382  | 3.309536963  | -6.559429502  |
| C | -1.211348663  | 1.448111465  | -5.984865620  |
| O | -0.293500662  | 1.136274864  | -5.135231424  |
| C | -2.317303877  | 0.601601188  | -6.268585484  |
| H | -2.406889648  | -0.310321058 | -5.702920617  |
| C | -3.231079726  | 0.886614118  | -7.271075374  |
| H | -4.036915847  | 0.200545841  | -7.458196154  |

|   |               |              |              |
|---|---------------|--------------|--------------|
| H | -10.043628714 | 2.834495214  | -8.876577134 |
| H | -9.427343651  | 0.027384494  | -7.289042106 |
| H | 4.594403248   | -0.816928962 | -5.637722487 |

pB'

|   |               |              |               |
|---|---------------|--------------|---------------|
| C | 3.525264028   | -1.326585963 | -5.239401088  |
| H | 2.763862407   | -1.771839478 | -5.867727579  |
| H | 3.979291498   | -2.125486036 | -4.662954388  |
| C | 2.858549828   | -0.307496959 | -4.294028033  |
| H | 3.583539048   | 0.065580588  | -3.580870592  |
| H | 2.455990307   | 0.532498138  | -4.843718235  |
| C | 1.728594119   | -1.021197709 | -3.551964857  |
| O | 2.053882295   | -1.911783805 | -2.773812585  |
| O | 0.539632982   | -0.689787185 | -3.818515781  |
| H | 0.005154583   | 0.564513462  | -4.469663544  |
| N | -9.135609980  | 2.305632381  | -8.940396704  |
| H | -8.386583132  | 2.265091424  | -8.282227262  |
| C | -9.593198437  | 0.983903556  | -9.333709917  |
| H | -10.400372022 | 1.094467490  | -10.042478441 |
| C | -8.493930335  | 0.075140564  | -9.957289265  |
| H | -8.034820758  | -0.566993155 | -9.218420451  |
| H | -8.966609340  | -0.566315961 | -10.686272625 |
| S | -7.131785445  | 0.889786466  | -10.814322512 |
| C | -10.127781814 | 0.188550003  | -8.147161437  |
| O | -11.174296976 | -0.381629314 | -8.156915338  |
| O | -6.283861455  | 0.876807072  | -8.324227743  |
| C | -6.004900906  | 1.179691269  | -9.445364306  |
| C | -4.811776710  | 1.924366878  | -9.879200166  |
| H | -4.924623785  | 2.378231287  | -10.846150724 |
| C | -3.669378805  | 2.253715039  | -9.230081613  |
| H | -3.125431976  | 2.990609815  | -9.779919582  |
| C | -2.916779397  | 1.931172986  | -8.009767655  |
| C | -1.922114154  | 2.888053614  | -7.688116101  |
| H | -1.828225352  | 3.769404423  | -8.295000172  |
| C | -1.069612257  | 2.723214493  | -6.632261966  |
| H | -0.329148167  | 3.466744507  | -6.407420215  |
| C | -1.121013291  | 1.547771348  | -5.845090964  |
| O | -0.239310109  | 1.478367767  | -4.863356669  |
| C | -2.073392436  | 0.590221665  | -6.162107348  |
| H | -2.132378072  | -0.315672434 | -5.586561525  |
| C | -2.972566189  | 0.798612137  | -7.224936251  |
| H | -3.706763294  | 0.039736757  | -7.428126239  |
| H | -9.922851045  | 2.947361376  | -8.818063836  |
| H | -9.492037263  | 0.149517193  | -7.266706170  |
| H | 4.339893688   | -0.887740307 | -5.806337515  |

pB'- pB intermediate

|   |             |              |              |
|---|-------------|--------------|--------------|
| C | 4.001077027 | -0.623902480 | -8.244288587 |
| H | 3.023943325 | -1.016468362 | -8.504401695 |
| H | 4.430419807 | -1.297620044 | -7.513176876 |

|   |               |              |               |
|---|---------------|--------------|---------------|
| C | 3.858051460   | 0.791044193  | -7.647403797  |
| H | 4.761510073   | 1.059324871  | -7.117298477  |
| H | 3.684947284   | 1.531759418  | -8.414777802  |
| C | 2.663944514   | 0.783686804  | -6.696280189  |
| O | 2.772348865   | 0.145324578  | -5.653605425  |
| O | 1.617315636   | 1.356511116  | -7.110423247  |
| H | -0.267113820  | 1.285795599  | -6.621731180  |
| N | -9.311730275  | 3.805858391  | -11.111491521 |
| H | -8.536437186  | 3.692377388  | -11.717357931 |
| C | -9.931889286  | 2.566095254  | -10.726452259 |
| H | -10.879500745 | 2.380390484  | -11.227258094 |
| C | -9.058829324  | 1.326591133  | -11.032288716 |
| H | -9.523694815  | 0.455067383  | -10.589769639 |
| H | -9.008509860  | 1.175377088  | -12.099134286 |
| S | -7.324670552  | 1.272237057  | -10.414166667 |
| C | -10.242507600 | 2.531041304  | -9.237111203  |
| O | -11.291716645 | 2.151811937  | -8.809802056  |
| O | -7.185555992  | 2.613883552  | -12.583518374 |
| C | -6.501763258  | 2.025792513  | -11.781149084 |
| C | -5.058711712  | 1.936828002  | -12.098710362 |
| H | -4.983197806  | 2.140168080  | -13.150063210 |
| C | -3.860741274  | 1.790221519  | -11.484248209 |
| H | -3.069264933  | 1.897309928  | -12.201671798 |
| C | -3.285063643  | 1.602067944  | -10.146245813 |
| C | -1.913915034  | 1.888125438  | -10.057680486 |
| H | -1.385445957  | 2.221336297  | -10.932444928 |
| C | -1.204552016  | 1.750291291  | -8.875599267  |
| H | -0.152581803  | 1.949801756  | -8.842960303  |
| C | -1.863419025  | 1.290543007  | -7.736296790  |
| O | -1.231038073  | 1.075360122  | -6.569759253  |
| C | -3.227529201  | 0.987799899  | -7.810442725  |
| H | -3.724496484  | 0.620776148  | -6.930411382  |
| C | -3.922854819  | 1.141288977  | -8.990528522  |
| H | -4.961315872  | 0.872189079  | -9.014024945  |
| H | -9.992450236  | 4.549861124  | -11.247682483 |
| H | -9.454054666  | 2.857238442  | -8.556103423  |
| H | 4.690651483   | -0.634973614 | -9.088747101  |

## pB

|   |              |             |               |
|---|--------------|-------------|---------------|
| C | 4.391339131  | 0.857503717 | -9.963197370  |
| H | 3.399383820  | 0.440794021 | -9.819079757  |
| H | 5.014183806  | 0.496396483 | -9.152343040  |
| C | 4.314484078  | 2.394031430 | -9.919885430  |
| H | 5.307756712  | 2.818372638 | -9.876747112  |
| H | 3.814357163  | 2.809111571 | -10.786600186 |
| C | 3.527019161  | 2.763620986 | -8.666141070  |
| O | 4.151014685  | 2.715421146 | -7.598128346  |
| O | 2.320101082  | 3.018346726 | -8.805687015  |
| H | -0.383245658 | 4.291602983 | -15.616511906 |
| N | -9.362682742 | 4.703227295 | -13.114579918 |
| H | -8.368468336 | 4.709283702 | -13.145887155 |

|   |               |             |               |
|---|---------------|-------------|---------------|
| C | -9.953670222  | 3.706443888 | -12.269711556 |
| H | -10.978717669 | 3.544088582 | -12.581510306 |
| C | -9.226491992  | 2.353588111 | -12.421363013 |
| H | -9.927327725  | 1.549759250 | -12.240470968 |
| H | -8.855451267  | 2.250446057 | -13.430530274 |
| S | -7.902635721  | 1.967434693 | -11.237198106 |
| C | -10.052131163 | 4.097504494 | -10.787523759 |
| O | -10.984402355 | 3.777288577 | -10.116249930 |
| O | -6.240437276  | 3.100132403 | -12.955318627 |
| C | -6.355707056  | 2.516774791 | -11.916872783 |
| C | -5.270027501  | 2.102218514 | -10.990877157 |
| H | -5.616881370  | 1.602732824 | -10.105044443 |
| C | -3.938123889  | 2.188097737 | -11.154957347 |
| H | -3.367608621  | 1.765057532 | -10.344193401 |
| C | -3.101059474  | 2.831867383 | -12.200298424 |
| C | -2.693039415  | 2.176045445 | -13.351478972 |
| H | -3.049932543  | 1.187034514 | -13.564519118 |
| C | -1.776615409  | 2.773907493 | -14.221525852 |
| H | -1.453059161  | 2.252571413 | -15.102476165 |
| C | -1.263267820  | 4.025854101 | -13.927853329 |
| O | -0.345446404  | 4.649470195 | -14.716504228 |
| C | -1.656532719  | 4.682501507 | -12.764748459 |
| H | -1.266175554  | 5.661029834 | -12.556618072 |
| C | -2.547348414  | 4.083858002 | -11.912780549 |
| H | -2.824712933  | 4.580293277 | -11.001669779 |
| H | -9.902034958  | 5.551530573 | -13.190185429 |
| H | -9.257091401  | 4.711442851 | -10.370693010 |
| H | 4.848148348   | 0.497115326 | -10.880994771 |

pR<sub>1</sub>(QM3)

|   |              |              |              |
|---|--------------|--------------|--------------|
| C | 1.007950815  | 6.949987395  | -0.266679461 |
| H | 0.079915057  | 7.479494162  | -0.081681764 |
| H | 1.808089776  | 7.660671223  | -0.102674393 |
| C | 1.016134890  | 6.470787868  | -1.705736228 |
| C | -0.167863213 | 6.370950748  | -2.424146685 |
| H | -1.096814037 | 6.609975349  | -1.940732038 |
| C | -0.190498223 | 5.968100226  | -3.751610478 |
| H | -1.118956416 | 5.895461864  | -4.290414435 |
| C | 0.998641418  | 5.631400195  | -4.386405733 |
| O | 1.045461655  | 5.072553935  | -5.610884787 |
| H | 0.240677817  | 5.206255478  | -6.173992140 |
| C | 2.196830691  | 5.766311500  | -3.697905888 |
| H | 3.114164400  | 5.508203286  | -4.190961122 |
| C | 2.197825471  | 6.188720201  | -2.383679421 |
| H | 3.141603410  | 6.288550547  | -1.876859408 |
| C | 3.097614721  | 0.023354132  | -5.058038349 |
| H | 2.508567913  | -0.365567423 | -5.879368526 |
| H | 3.479071532  | -0.814067812 | -4.488457624 |
| C | 2.214240385  | 0.905077763  | -4.157244758 |
| H | 2.783329092  | 1.302188738  | -3.327634323 |
| H | 1.795791459  | 1.736836012  | -4.703217056 |



|   |              |              |               |
|---|--------------|--------------|---------------|
| C | 1.117643554  | 0.034596155  | -3.587548269  |
| O | 1.361366587  | -0.951617298 | -2.955842590  |
| O | -0.133643288 | 0.334150233  | -3.856153053  |
| H | -0.233825335 | 1.225313127  | -4.214783460  |
| C | -7.347060676 | 2.127475991  | -13.803907634 |
| H | -7.705375217 | 1.511641342  | -14.616131898 |
| H | -6.630678773 | 2.832001567  | -14.207831645 |
| S | -6.568964588 | 0.936763383  | -12.693542580 |
| O | -5.258030270 | 3.054036731  | -11.830951649 |
| C | -5.406271630 | 1.868720471  | -11.705263268 |
| C | -4.771587682 | 0.934132891  | -10.775775548 |
| H | -5.143878869 | -0.067119453 | -10.884578465 |
| C | -3.863422784 | 1.100474657  | -9.778613096  |
| H | -3.720882553 | 0.190017018  | -9.218278896  |
| C | -3.059812954 | 2.188362675  | -9.265579457  |
| C | -2.688240317 | 3.359329595  | -9.967681460  |
| H | -2.986479936 | 3.470075180  | -10.990624845 |
| C | -1.936409200 | 4.343993965  | -9.371123172  |
| H | -1.638730932 | 5.211338167  | -9.928960079  |
| C | -1.536156627 | 4.278224938  | -7.995549403  |
| O | -0.921588924 | 5.234754372  | -7.435074918  |
| C | -1.873269173 | 3.080016550  | -7.325486702  |
| H | -1.608203204 | 2.977013395  | -6.291394611  |
| C | -2.597503913 | 2.076409238  | -7.948933280  |
| H | -2.832674706 | 1.188474151  | -7.384554208  |
| O | -0.422412382 | 2.927359497  | -4.320711939  |
| H | -0.464518818 | 3.393224906  | -3.494960682  |
| H | 0.124009983  | 3.466263543  | -4.889802435  |
| H | 1.082093559  | 6.182314458  | 0.503127644   |
| H | 3.971335747  | 0.578298148  | -5.393126179  |
| H | -8.120462275 | 2.728663839  | -13.331062997 |

pB

|   |              |              |              |
|---|--------------|--------------|--------------|
| C | 1.150310952  | 6.997118937  | -0.131713353 |
| H | 0.284010432  | 7.608465506  | 0.097367162  |
| H | 2.019955836  | 7.628552863  | -0.009705933 |
| C | 1.040267923  | 6.503272048  | -1.557336713 |
| C | -0.213106547 | 6.275159558  | -2.111460558 |
| H | -1.090174254 | 6.460989198  | -1.519758424 |
| C | -0.350202371 | 5.779462825  | -3.392971605 |
| H | -1.323415371 | 5.595633739  | -3.812228817 |
| C | 0.778569723  | 5.468057201  | -4.133637949 |
| O | 0.648708838  | 4.830542499  | -5.337869596 |
| H | -0.091726204 | 5.049118040  | -7.060074096 |
| C | 2.032349506  | 5.745000739  | -3.627878815 |
| H | 2.903286505  | 5.493716530  | -4.201007251 |
| C | 2.154284153  | 6.271318843  | -2.351041551 |
| H | 3.139168946  | 6.456389960  | -1.960611079 |
| C | 3.135191264  | 0.121971534  | -5.085388404 |
| H | 2.533894453  | -0.258108610 | -5.905044471 |
| H | 3.500629742  | -0.723677336 | -4.519449032 |

|   |              |              |               |
|---|--------------|--------------|---------------|
| C | 2.270041533  | 1.013664601  | -4.179434324  |
| H | 2.858618997  | 1.400972022  | -3.357846391  |
| H | 1.859473263  | 1.852584116  | -4.731339974  |
| C | 1.136288342  | 0.150361465  | -3.622054410  |
| O | 1.456966807  | -0.732677557 | -2.830623404  |
| O | -0.021617218 | 0.366137131  | -4.043070787  |
| H | -0.533056827 | 1.870644787  | -4.363768636  |
| C | -7.407794349 | 2.099208909  | -13.728197134 |
| H | -7.795866538 | 1.472752868  | -14.518685389 |
| H | -6.679098862 | 2.772799867  | -14.159572637 |
| S | -6.645973054 | 0.918034186  | -12.596699016 |
| O | -5.259857016 | 3.016177961  | -11.812957982 |
| C | -5.459365147 | 1.843547504  | -11.654529616 |
| C | -4.826840830 | 0.916989484  | -10.696651854 |
| H | -5.242917994 | -0.071380500 | -10.743705184 |
| C | -3.855080892 | 1.081306408  | -9.771410041  |
| H | -3.688374332 | 0.191365819  | -9.188450868  |
| C | -2.982680036 | 2.181941083  | -9.357076956  |
| C | -2.608282719 | 3.278877772  | -10.155865779 |
| H | -2.993809824 | 3.372318700  | -11.148777985 |
| C | -1.739996576 | 4.232402908  | -9.671501006  |
| H | -1.421629943 | 5.057368448  | -10.277352334 |
| C | -1.246809937 | 4.148522467  | -8.359506931  |
| O | -0.421704331 | 5.133279094  | -7.981822175  |
| C | -1.619542446 | 3.092355619  | -7.556621852  |
| H | -1.338104844 | 2.996724257  | -6.534264848  |
| C | -2.457670693 | 2.109181079  | -8.082748765  |
| H | -2.700004504 | 1.273276970  | -7.450775766  |
| O | -0.876907853 | 2.781582262  | -4.489415180  |
| H | -1.267853818 | 3.017813495  | -3.659603605  |
| H | 0.195882985  | 4.002770219  | -5.127321669  |
| H | 1.180604068  | 6.227889319  | 0.642305068   |
| H | 4.019799207  | 0.653597563  | -5.446065124  |
| H | -8.159501162 | 2.729291432  | -13.256414343 |

#### pB(QM4)

|   |              |              |               |
|---|--------------|--------------|---------------|
| C | 3.447304328  | 0.107052173  | -5.032742841  |
| H | 2.774759088  | -0.465295879 | -5.664783818  |
| H | 3.958050276  | -0.592661442 | -4.386289743  |
| C | 2.639932313  | 1.099838724  | -4.175873760  |
| H | 3.299701691  | 1.652069934  | -3.520526219  |
| H | 2.119120748  | 1.823667680  | -4.787117167  |
| C | 1.649619256  | 0.321598190  | -3.295279955  |
| O | 2.136363745  | -0.501675122 | -2.522204038  |
| O | 0.424433033  | 0.543478275  | -3.423617963  |
| H | -1.351175004 | 5.374649691  | -8.125972862  |
| C | -9.182185515 | -0.030991589 | -11.652970977 |
| H | -9.686437934 | -0.778928267 | -12.244427785 |
| H | -8.692216014 | 0.661546768  | -12.326040358 |
| S | -7.963144282 | -0.969774613 | -10.703838981 |
| O | -7.132108560 | 1.462413930  | -10.298665107 |

|   |              |              |               |
|---|--------------|--------------|---------------|
| C | -6.876724604 | 0.298826516  | -10.122664352 |
| C | -5.723904717 | -0.278620593 | -9.419882992  |
| H | -5.796529214 | -1.343194201 | -9.296896379  |
| C | -4.588835018 | 0.288527181  | -8.942187281  |
| H | -3.946299874 | -0.433025350 | -8.467567730  |
| C | -4.008878560 | 1.633287936  | -8.914435586  |
| C | -2.820889130 | 1.785933966  | -8.191234493  |
| H | -2.377060599 | 0.941668279  | -7.695287882  |
| C | -2.183342873 | 3.016958170  | -8.082595621  |
| H | -1.266567092 | 3.088947543  | -7.536489357  |
| C | -2.727900109 | 4.126531411  | -8.688952260  |
| O | -2.174869555 | 5.344051498  | -8.615696931  |
| C | -3.896894462 | 4.000433320  | -9.440549534  |
| H | -4.272312123 | 4.860763426  | -9.956407232  |
| C | -4.521320198 | 2.773922263  | -9.560213814  |
| H | -5.398885056 | 2.702331836  | -10.161597722 |
| O | -0.585326744 | 1.981442761  | -5.234342603  |
| H | -1.180393932 | 2.620923171  | -4.860781370  |
| H | -0.144732131 | 1.474348983  | -4.479600572  |
| O | 1.107013600  | 3.177953474  | -6.842589496  |
| H | 1.652843142  | 2.540596525  | -7.301501585  |
| H | 0.517995946  | 2.695659413  | -6.245186747  |
| O | 0.105122397  | 5.558445226  | -7.171410661  |
| H | 0.637607096  | 4.747790587  | -7.145017522  |
| H | 0.663143555  | 6.293473536  | -6.960037159  |
| H | 4.219632348  | 0.613446292  | -5.619819891  |
| H | -9.834058912 | 0.591532173  | -11.044385179 |

### pB-pG' Intermediate

|   |              |              |               |
|---|--------------|--------------|---------------|
| C | 3.365177517  | 0.175084990  | -5.137748308  |
| H | 2.679447772  | -0.373557062 | -5.775915273  |
| H | 3.863867880  | -0.537192633 | -4.496294977  |
| C | 2.585339964  | 1.189175226  | -4.278953467  |
| H | 3.264260172  | 1.787711139  | -3.686699152  |
| H | 2.008460477  | 1.870347459  | -4.886196923  |
| C | 1.720381711  | 0.433268877  | -3.286331943  |
| O | 2.194127739  | -0.387448643 | -2.545653523  |
| O | 0.437282749  | 0.666612169  | -3.242641715  |
| H | -1.179528087 | 5.289970583  | -8.128600598  |
| C | -9.160483692 | -0.008572735 | -11.672362889 |
| H | -9.678003589 | -0.775497299 | -12.232328835 |
| H | -8.677107421 | 0.656609396  | -12.373615615 |
| S | -7.942443132 | -0.930439942 | -10.706350139 |
| O | -7.107848747 | 1.505838506  | -10.303899146 |
| C | -6.858641770 | 0.342600986  | -10.119319952 |
| C | -5.719926627 | -0.243965009 | -9.405575733  |
| H | -5.802414406 | -1.308829452 | -9.290440205  |
| C | -4.574089144 | 0.305365697  | -8.929698116  |
| H | -3.938966101 | -0.432356135 | -8.469454353  |
| C | -3.968969007 | 1.634439352  | -8.895469556  |
| C | -2.737657439 | 1.746239577  | -8.236289597  |

|   |              |             |               |
|---|--------------|-------------|---------------|
| H | -2.286813859 | 0.877005497 | -7.791226130  |
| C | -2.059681374 | 2.954311124 | -8.140888093  |
| H | -1.103743195 | 2.994926547 | -7.659027969  |
| C | -2.611788894 | 4.096198347 | -8.690542861  |
| O | -2.016604822 | 5.284189264 | -8.636541329  |
| C | -3.833079348 | 4.011502522 | -9.365530139  |
| H | -4.222112485 | 4.895586675 | -9.828783703  |
| C | -4.491733368 | 2.802184535 | -9.480922212  |
| H | -5.406046518 | 2.760897962 | -10.029895082 |
| O | -0.604497619 | 2.035875055 | -5.164647239  |
| H | -1.227825486 | 2.730520589 | -4.973016774  |
| H | 0.108200026  | 1.304882726 | -3.932682720  |
| O | 1.023110632  | 3.162821322 | -6.696923457  |
| H | 1.494656102  | 2.664006152 | -7.354479794  |
| H | 0.056164884  | 2.460690078 | -5.796507042  |
| O | 0.140063018  | 5.296128413 | -7.212114604  |
| H | 0.664994384  | 4.314787366 | -7.028628426  |
| H | 0.711469657  | 6.034087783 | -7.060752818  |
| H | 4.134797636  | 0.677956136 | -5.721855743  |
| H | -9.818452893 | 0.610889593 | -11.069336256 |

pG'

|   |              |              |               |
|---|--------------|--------------|---------------|
| C | 3.467113915  | 0.187523006  | -5.153391512  |
| H | 2.789103051  | -0.391107005 | -5.769530909  |
| H | 3.999721857  | -0.501845127 | -4.512492780  |
| C | 2.665418616  | 1.177920409  | -4.291402324  |
| H | 3.321770605  | 1.859926768  | -3.764117800  |
| H | 2.010479320  | 1.791394298  | -4.890229539  |
| C | 1.883133153  | 0.451339421  | -3.213689311  |
| O | 2.333224762  | -0.480713115 | -2.609498276  |
| O | 0.672948670  | 0.868695620  | -2.934165018  |
| H | -0.662146426 | 5.416406327  | -7.814433145  |
| C | -9.270272148 | 0.047837857  | -11.740211615 |
| H | -9.807407112 | -0.682512956 | -12.327537506 |
| H | -8.799922476 | 0.749717413  | -12.416608620 |
| S | -8.031992729 | -0.931895074 | -10.862584112 |
| O | -7.197799619 | 1.486075922  | -10.355421589 |
| C | -6.944184384 | 0.313645751  | -10.201386030 |
| C | -5.830091435 | -0.299043109 | -9.511400123  |
| H | -5.920126393 | -1.365676138 | -9.420679933  |
| C | -4.675779856 | 0.237338975  | -9.014378594  |
| H | -4.064508048 | -0.518561404 | -8.548483747  |
| C | -4.051275119 | 1.528564494  | -8.969874576  |
| C | -2.823928105 | 1.626021343  | -8.278333523  |
| H | -2.406706331 | 0.743208734  | -7.822331168  |
| C | -2.129220725 | 2.807781934  | -8.168715831  |
| H | -1.186768639 | 2.832763582  | -7.658629551  |
| C | -2.612636435 | 4.011282014  | -8.745664504  |
| O | -1.985368076 | 5.100451583  | -8.663489786  |
| C | -3.845169995 | 3.909482795  | -9.454378840  |
| H | -4.211220075 | 4.797558950  | -9.932449632  |

|   |              |             |               |
|---|--------------|-------------|---------------|
| C | -4.521222850 | 2.719708165 | -9.574683213  |
| H | -5.424735418 | 2.697793575 | -10.144544085 |
| O | -0.660334322 | 2.007811240 | -4.994191400  |
| H | -1.375818598 | 2.624888550 | -4.872613980  |
| H | 0.302965035  | 1.477938393 | -3.581447374  |
| O | 1.148329394  | 3.159749284 | -6.647833218  |
| H | 1.607038538  | 2.668736018 | -7.325470933  |
| H | -0.068248199 | 2.448758777 | -5.612839250  |
| O | 0.118827583  | 5.590054994 | -7.221715679  |
| H | 0.968722921  | 4.044694033 | -6.970290973  |
| H | 0.251407689  | 6.527260764 | -7.209872480  |
| H | 4.219697278  | 0.706603983 | -5.735798399  |
| H | -9.901776508 | 0.644449675 | -11.093520556 |

pG

|   |              |              |               |
|---|--------------|--------------|---------------|
| C | 3.536549024  | -0.479241101 | -5.490588563  |
| H | 2.886889074  | -1.112966521 | -6.078985509  |
| H | 4.005646737  | -1.095146118 | -4.736897251  |
| C | 2.708635856  | 0.626208952  | -4.803025722  |
| H | 3.351197146  | 1.266504998  | -4.208838550  |
| H | 2.172963633  | 1.238362035  | -5.516099299  |
| C | 1.744058520  | -0.048965864 | -3.841171876  |
| O | 2.145584283  | -0.785968939 | -2.981402666  |
| O | 0.455963918  | 0.134549640  | -3.980581585  |
| H | 0.183998519  | 0.684286536  | -4.760539599  |
| C | -8.949897235 | -0.025729806 | -12.252320728 |
| H | -9.493342108 | -0.831810125 | -12.721546534 |
| H | -8.432931862 | 0.538683056  | -13.015093537 |
| S | -7.745257560 | -0.845666255 | -11.169862312 |
| O | -6.927531599 | 1.617734983  | -11.162073088 |
| C | -6.671215709 | 0.497918980  | -10.781025727 |
| C | -5.538530117 | 0.174523546  | -9.942105847  |
| H | -5.472254265 | -0.809940742 | -9.521701352  |
| C | -4.646911194 | 1.163750064  | -9.694422107  |
| H | -4.781741609 | 2.066405671  | -10.262210245 |
| C | -3.558318365 | 1.189931013  | -8.759169478  |
| C | -2.718503323 | 2.313700609  | -8.730784463  |
| H | -2.918355287 | 3.142225172  | -9.389654642  |
| C | -1.636247810 | 2.391189393  | -7.883060819  |
| H | -0.984982226 | 3.241637051  | -7.946836362  |
| C | -1.358024060 | 1.361123706  | -6.961572937  |
| O | -0.319297023 | 1.386119573  | -6.204099732  |
| C | -2.271699847 | 0.273730449  | -6.924899419  |
| H | -2.102442880 | -0.503122987 | -6.200551969  |
| C | -3.315699148 | 0.175552952  | -7.814947770  |
| H | -3.959182424 | -0.685869617 | -7.772027156  |
| O | 5.204985971  | 5.285878620  | -5.718261095  |
| H | 5.139520723  | 4.628899461  | -5.022780174  |
| H | 5.933258667  | 5.013345081  | -6.269878528  |
| O | 3.030727727  | 6.673212612  | -6.990671124  |
| H | 3.768922999  | 6.208850474  | -6.599502772  |

|   |              |              |               |
|---|--------------|--------------|---------------|
| H | 2.705720338  | 7.256000332  | -6.317847493  |
| O | 0.611457607  | 5.623394378  | -8.190109303  |
| H | 1.514072801  | 5.860708096  | -7.987620476  |
| H | 0.376453872  | 5.057349874  | -7.456197610  |
| H | 4.352664989  | -0.046207242 | -6.076968179  |
| H | -9.559221342 | 0.708092410  | -11.723481147 |
